1  
2  
3  
4  
5  
6  
7  
8  
9  
10  
11  
12  
13  
14  
15  
16  
17  
18  
19  
20  
21  
22  
23

**Three bacterium-plasmid golden combinations facilitate the spread of  
ST11/CG258 carbapenemase-producing *Klebsiella pneumoniae* in China**

Cuidan Li<sup>1#</sup>, Xiaoyuan Jiang<sup>1,2#</sup>, Tingting Yang<sup>1#</sup>, Yingjiao Ju<sup>1,3#</sup>, Zhe Yin<sup>2</sup>, Liya Yue<sup>1</sup>, Guan  
Ma<sup>1</sup>, Xuebing Wang<sup>1</sup>, Ying Jing<sup>2</sup>, Xinhua Luo<sup>2</sup>, Shuangshuang Li<sup>1,3</sup>, Xue Yang<sup>1,3</sup>, Fei  
Chen<sup>1,3,4,5\*</sup>, Dongsheng Zhou<sup>2\*</sup>

<sup>1</sup>*CAS Key Laboratory of Genome Sciences & Information, Beijing Institute of Genomics,  
Chinese Academy of Sciences, China National Center for Bioinformation, Beijing, China;*

<sup>2</sup>*State Key Laboratory of Pathogen and Biosecurity, Beijing Institute of Microbiology and  
Epidemiology, Beijing, China;*

<sup>3</sup>*University of Chinese Academy of Sciences, Beijing, China*

<sup>4</sup>*State Key Laboratory of Pathogenesis, Prevention and Treatment of High Incidence Diseases  
in Central Asia, Xinjiang, China*

<sup>5</sup>*Beijing Key Laboratory of Genome and Precision Medicine Technologies, Beijing, China*

<sup>#</sup>These authors contributed equally to this work.

\*To whom correspondence should be addressed. Tel: +86 010 66948503; E-mail:  
dongshengzhou1977@gmail.com

\*Correspondence may also be addressed to Prof. Fei Chen. Tel: +86 010 84097460; Fax: +86  
010 84097720; E-mail: chenfei@big.ac.cn

24 **Abstract**

25 Carbapenemase-producing *Klebsiella pneumoniae* (cpKP) poses serious threats to public health.  
26 Previous studies showed that only ST11/CG258-cpKP successfully disseminated in China,  
27 however, the underlying genetic bases are still unknown. We conducted a comprehensive  
28 genomic-epidemiology analysis on 420 cpKP isolates from 70 hospitals in 24 Chinese  
29 provinces during 2009-2017 based on short-/long-reads sequencing. Three ‘golden’  
30 combinations of host—*bla*<sub>KPC</sub>-carrying plasmids (Clade 3.1+3.2—IncFII<sub>pHN7A8</sub>, Clade  
31 3.1+3.2—IncFII<sub>pHN7A8</sub>:IncR, Clade 3.3—IncFII<sub>pHN7A8</sub>:Inc<sub>pA1763-KPC</sub>) endowed cpKP with  
32 advantages both in genotypes (strong-correlation/co-evolution) and phenotypes  
33 (resistance/growth/competition), thereby facilitating nationwide spread of ST11/CG258-cpKP.  
34 Intriguingly, Bayesian skyline illustrated that the three ‘golden’ combinations might directly  
35 lead to the strong population expansion during 2007-2008 and subsequent maintenance of the  
36 dissemination of ST11/CG258-cpKP after 2008. We tested drug-resistance profiles and  
37 proposed combination treatment regimens for CG258/non-CG258 cpKP. Our findings  
38 systematically revealed the molecular-epidemiology and genetic-basis for dissemination of  
39 Chinese ST11/CG258 cpKP and reminded us to monitor the ‘golden’ combinations of cpKP-  
40 plasmid closely.

41

42 **Keywords:** *Klebsiella pneumoniae*; drug resistance; carbapenemase; plasmid; genomic  
43 epidemiology

## 44 **Introduction**

45 Antimicrobial-resistant *Klebsiella pneumoniae* (KP) is listed as the ‘K’ in ESKAPE pathogens,  
46 the six most significant and dangerous causes for antimicrobial-resistant nosocomial infections,  
47 and has been recognized as a major threat to global public health (1). Carbapenems (e.g.  
48 imipenem and meropenem) are the first choice for treatment of severe or refractory infections  
49 caused by KP, but clinical carbapenem-resistant KP isolates spread worldwide in recent years  
50 (2). It remains the top priority in antimicrobial-resistant *K. pneumoniae* due to high morbidity  
51 and mortality, limited treatment options, prolonged hospitalization, and high treatment costs (3-  
52 6). The Centers for Disease Control and Prevention (CDC) has classified it as one of the most  
53 “urgent” public health threats in the United States (7); according to the report of China  
54 Antimicrobial Resistance Surveillance System (CARSS), the resistant rate for the two main  
55 carbapenem antibiotics (imipenem and meropenem) has been steadily increasing from 2005 to  
56 2017 (about 20%) (<http://www.chinets.com>).

57 Production of exogenous carbapenemases is one of the major causes for carbapenem  
58 resistance in KP, and carbapenemase-producing KP (cpKP) has emerged as a threatening  
59 epidemic pathogen in hospital settings (3, 8). The carbapenemase genes in cpKP mainly include  
60 *bla<sub>KPC</sub>*, *bla<sub>NDM</sub>*, and *bla<sub>IMP</sub>*, of which *bla<sub>KPC</sub>* is the most clinically significant one in most  
61 countries (3, 7). They are typically carried on the plasmids of many incompatibility (Inc) groups  
62 such as IncFII, X, I, C, N, R, P-2, U, W, and L/M(3, 9). *bla<sub>KPC</sub>* on these plasmids are usually  
63 located on *Tn4401b* and its derivatives in European and American countries (9), but on *Tn6296*  
64 and its derivatives in China (10). *Tn4401b* and *Tn6296* are genetically wildly divergent, but  
65 both belong to Tn3-family unit transposons (9, 10).

66 Genomic studies showed that the clonal group CG258 is highly associated with cpKP isolates,  
67 especially *bla<sub>KPC</sub>*-carrying cpKP (11-15). CG258 mainly consists of ST258 and its single-locus  
68 allelic variants ST11 and ST512. ST258 is a recombined hybrid from ST11 and ST442, which

69 contribute to the genome composition of ST258 by 80% and 20%, respectively (16). The cpKP  
70 isolates of ST258 and ST512 are mostly prevalent in American and European countries (9, 13,  
71 17), while those of ST11 are highly dominant in China (18-20).

72 On the one hand, there are several publications to explore why ST258 cpKP successfully  
73 spread in USA and European countries (8, 21). On the other hand, although 115 STs of cpKP  
74 have been identified worldwide so far (9), it is reported that only ST11/CG258 has been  
75 successfully clonal spread in China (18-20). What is the cause of this phenomenon? Previous  
76 research only reported this phenomenon without deep mining the genetic basis (18-20). A large-  
77 scale genomic study on cpKP isolates is necessary to uncover the genetic basis for its  
78 dissemination in China, however, it is still lacking until now.

79 In this study, we employed second- and third-generation sequencing technologies to  
80 comprehensively analyze the genomic epidemiology in 420 clinical cpKP isolates collected  
81 from multicenter hospitals of 24 provinces of China from 2009 to 2017. The results displayed  
82 a panoramic population snapshot of cpKP isolates harboring mainly *bla*<sub>KPC</sub>-carrying plasmids  
83 of diverse Inc groups and further provided essential insights into the evolution of host KP—  
84 *bla*<sub>KPC</sub>-carrying plasmids and their role in facilitating the nationwide spread of ST11/CG258  
85 cpKP.

86

## 87 **Results**

### 88 **Genetic diversity of CG258 and non-CG258 cpKP from China**

89 All the 420 cpKP isolates were sequenced using Illumina platform, and 69 of them were  
90 determined for complete genome sequences using PacBio (35/69) or Nanopore (34/69)  
91 sequencing platforms (Figure 1 and Table S1).

92 We first performed multilocus sequence typing (MLST; Figure 2a and Figure S1), and the  
93 results showed that 420 cpKP isolates were assigned into 48 STs, including six novel ones:

94 ST3333, ST3334, ST3345, ST3348, ST3349 and ST3350, which can further be assigned into  
95 four singletons and 31 CGs. Among those 420 cpKp isolates, CG258 and non-CG258 account  
96 for 313 and 107, respectively. Additionally, CG258 was the most prevalent CG (313/420,  
97 74.52%) and composed of four STs: ST11 (298/313, 95.21%), ST2667 (7/313, 2.24%), ST3348  
98 (6/313, 1.92%) and ST258 (2/313, 0.64%). Therefore, CG258 accounts for most of the cpKP  
99 isolates, and ST11 is the overwhelmingly dominant ST of CG258 in China.

100 We next analyzed the core-genome clustering in 2,300 global KP isolates, including our 420  
101 cpKP isolates (Figure S2). Our 313 CG258 isolates were clustered with the other CG258  
102 isolates, while our 107 non-CG258 isolates were scattered in the tree. Thus, in terms of genetic  
103 diversity, our 420 cpKP isolates showed good representativity.

104 We further performed the core-genome clustering analysis in our 420 cpKP isolates (Figure  
105 2b). We found that the 313 CG258 isolates gathered at the farthest position from the root,  
106 suggesting CG258 was the latest clone different from other STs/CGs of cpKP. In contrast, the  
107 107 non-CG258 isolates were located at earlier splitting branches in the tree and showed a  
108 highly dispersed pattern in the tree (containing several CGs), illustrating that they had an overall  
109 non-clonal population structure with a high level of genetic diversity.

110

### 111 **Phylogeny and evolutionary history of CG258**

112 Based on the analysis of whole-genome sequencing data, the 313 CG258 cpKP isolates had a  
113 total of 6,459 core single nucleotide polymorphisms (SNPs) with an inferred  $r/m$  ratio of 3.41,  
114 indicating the presence of frequent recombination. Moreover, recombination removal generated  
115 a final collection of 233 non-redundant CG258 cpKP isolates (225 of them belonged to ST11)  
116 with 1,271 recombination-free SNPs. Based on these SNPs, a time-calibrated Bayesian  
117 maximum clade credibility (MCC) tree (Figure 3a) showed that the CG258 cpKP isolates in  
118 China could be divided into three major clades: 1 to 3. Here the Clade 1 to Clade 3 isolates had

119 strong hospital and temporal diversity: the 23 Clade1 isolates were from 8 hospitals during  
120 2010-2017; the 24 Clade 2 isolates were from 15 hospitals during 2011-2015; the 186 Clade3  
121 isolates were from 42 hospitals during 2009-2017. These indicated that the formation of three  
122 major clades were not transmission events. Among the three clades, Clade 2 could be further  
123 discriminated into two subclades 2.1 and 2.2, and Clade 3 into three subclades 3.1 to 3.3. The  
124 emerging time-points of Clades 1, 2.1, 2.2, 3.1, 3.2 and 3.3 were in 1995, 2006, 2006, 2007,  
125 2008 and 2010, respectively.

126 We further performed a Bayesian skyline plot (Figure 3b) based on the above 1,271 SNPs,  
127 and the results showed a strong population expansion of CG258 cpKP during 2007-2008, which  
128 was consistent with the estimated emergence stage of Clade 3. Notably, Clade 3 accounted for  
129 79.8% (186/233) of the CG258 cpKP isolates, and, thus, it was the dominant lineage among the  
130 three clades. Therefore, this population expansion should represent the emergence and  
131 subsequent nationwide spread of the dominant Clade 3 of CG258 cpKP in China.

132

### 133 **Prevalence of carbapenemase genes and *bla*<sub>KPC</sub>-carrying plasmids**

134 In the 420 cpKp isolates, we identified three kinds of carbapenemase genes, including *bla*<sub>KPC</sub>-  
135 *2/-3/-5* (375/420, 89.29%; especially *bla*<sub>KPC-2</sub> in 372 isolates), *bla*<sub>NDM-1/-5</sub> (29/420, 6.9%) and  
136 *bla*<sub>IMP-4/-38</sub> (19/420, 4.52%) (Table S2). Most (309/375, 82.43%) of the *bla*<sub>KPC</sub>-carrying isolates  
137 belong to CG258 and, meanwhile, *bla*<sub>KPC</sub> was found in almost all (309/313, 98.72%) of the  
138 CG258 cpKP isolates. In contrast, the majority of the *bla*<sub>NDM</sub>-carrying isolates (27/29, 93.10%)  
139 and the *bla*<sub>IMP</sub>-carrying isolates (17/19, 89.47%) were assigned into non-CG258 (Table S3 and  
140 Figure S3). Thus, the dissemination of *bla*<sub>KPC</sub>, as the most prevalent carbapenemase gene, was  
141 highly associated with the spread of CG258 cpKP isolates in China.

142 All the detected *bla*<sub>KPC</sub> genes were located in plasmids. A total of 377 *bla*<sub>KPC</sub>-carrying  
143 plasmids were identified from the 375 *bla*<sub>KPC</sub>-harboring isolates with two isolates each carrying

144 a double copy of *bla<sub>KPC</sub>* in two different plasmids. 79 of these 377 plasmids had the complete  
145 sequences (Table S1). These 377 plasmids could be assigned into 32 Inc groups, 20 (62.50%)  
146 of which had multiple replicons (Table S4). The top five Inc groups, including  
147 IncFII<sub>pHN7A8</sub>:IncR (n=163), IncFII<sub>pHN7A8</sub>:Inc<sub>pA1763-KPC</sub> (n=59), IncFII<sub>pKPHS2</sub>:Inc<sub>pA1763-KPC</sub> (n=36),  
148 IncFII<sub>p0716-KPC</sub>:Inc<sub>pA1763-KPC</sub> (n=30) and IncFII<sub>pHN7A8</sub> (n=28), accounted for 83.82% of all  
149 *bla<sub>KPC</sub>*-harboring plasmids (Table S4). Each of top five Inc group had at least five complete  
150 plasmid sequences (Table S1, and Figure S4 to S8). The plasmids of each Inc group carried the  
151 identical core backbone *rep* (replication) and *par* (partition) genes but showed considerable  
152 modular divergence across whole plasmid genomes (Figure S4 to S8). Overall, the *bla<sub>KPC</sub>*-  
153 harboring plasmids in cpKP isolates of China showed a high level of diversity, with the  
154 aforementioned top five Inc groups as the major types.

155 Notably, 62.50% (20/32) of Inc groups had a primary or single replicon belonging to the  
156 IncFII family, which accounted for a huge percentage of all plasmids (92.04%, 347/377) (Table  
157 S4). The IncFII replicons could be further divided into seven distinct sub-groups and displayed  
158 a high degree of genetic divergence, among which IncFII<sub>pHN7A8</sub> (253/255, 99.22%) and  
159 IncFII<sub>p0716-KPC</sub> (29/32, 90.63%) were highly associated with CG258. In contrast, IncFII<sub>pKPHS2</sub>  
160 (35/42, 83.33%) was highly associated with non-CG258 (Figure S9).

161 The local *bla<sub>KPC</sub>* genetic environments of the 377 *bla<sub>KPC</sub>*-carrying plasmids could be divided  
162 into six major types: type 1 to type 6 (Figure S10). The former five types represented different  
163 derivatives of Tn6296 and accounted for 99.73% (376/377) of all plasmids, while type 6 was  
164 Tn4401b corresponding to the sole *bla<sub>KPC</sub>*-carrying ST258 cpKP isolate.

165

166 **Strong correlation between three major Inc groups of *bla<sub>KPC</sub>*-carrying plasmids and**  
167 **CG258**

168 IncFII<sub>pKPHS2</sub>:Inc<sub>pA1763-KPC</sub> and the other four top Inc groups of plasmids were highly associated

169 with non-CG258 and CG258, respectively (Figure 4a). Firstly, 91.67% (33/36) of the *bla*<sub>KPC</sub>-  
170 carrying IncFII<sub>pKPHS2</sub>:Inc<sub>pA1763-KPC</sub> plasmids came from non-CG258 involving 11 STs that could  
171 be further assigned into nine CGs (Table S3), indicating a highly dispersed dissemination of  
172 IncFII<sub>pKPHS2</sub>:Inc<sub>pA1763-KPC</sub> plasmids among a lot of non-CG258 subtypes.

173 Secondly, 98.93% (277/280) of the other four top Inc groups of *bla*<sub>KPC</sub>-carrying plasmids  
174 corresponded to 88.50% of the CG258 cpKP isolates (277/313). In addition, we also  
175 downloaded 38 complete genomes of ST11/CG258 cpKP isolates from NCBI, and 77.5%  
176 ST11/CG258 cpKP isolates harbored the four Inc groups of plasmids (Table S5). Previous  
177 studies also demonstrated the strong association between ST11/CG258 cpKP and the four Inc  
178 groups of plasmids of IncFII-like plasmids (8, 21).

179 Moreover, different Inc groups of *bla*<sub>KPC</sub>-carrying plasmids had strongly correlated with  
180 various clades of CG258 (Figure 4b). We observed a strong correlation of IncFII<sub>pHN7A8</sub> (13/13,  
181 100%)+IncFII<sub>pHN7A8</sub>:IncR (119/122, 97.54%), IncFII<sub>pHN7A8</sub>:Inc<sub>pA1763-KPC</sub> (45/45, 100%), and  
182 IncFII<sub>p0716-KPC</sub>:Inc<sub>pA1763-KPC</sub> (23/23, 100%) with Clade 3.1+3.2, Clade 3.3, and Clade 2.2+an  
183 unnamed subclade of Clade 1, respectively (Figure 4b). And vice versa, Clade 3.1 +3.2 (132/136,  
184 97.06%), Clade 3.3 (45/47, 95.74%), and Clade 2.2+an unnamed subclade of Clade 1 (23/28,  
185 82.14%) showed a higher correlation with IncFII<sub>pHN7A8</sub>+IncFII<sub>pHN7A8</sub>:IncR,  
186 IncFII<sub>pHN7A8</sub>:Inc<sub>pA1763-KPC</sub>, and IncFII<sub>p0716-KPC</sub>:Inc<sub>pA1763-KPC</sub>, respectively (Figure 4b). In  
187 addition, we obtained four nonsynonymous and eight synonymous SNPs for discriminating  
188 Clade 2+3 from Clade 1, and one nonsynonymous and four synonymous SNPs for  
189 differentiating Clade 3 from the other two clades (Figure 4b), indicating the potential markers  
190 for accurate classification of various types of CG258 cpKP isolates.

191

192 **Acquisition of three IncFII<sub>pHN7A8</sub>—related Inc groups of *bla*<sub>KPC</sub>-carrying plasmids**  
193 **promoted nationwide spread of CG258**



194 As described above, Clade 3 represented the dominant lineage of the nationwide spread CG258  
195 cpKP in China. Almost all the Clade 3 isolates (180/186, 96.77%) contained the *bla*<sub>KPC</sub>-carrying  
196 plasmids of three IncFII<sub>pHN7A8</sub>-related Inc groups, including IncFII<sub>pHN7A8</sub>, IncFII<sub>pHN7A8</sub>:IncR,  
197 and IncFII<sub>pHN7A8</sub>:Inc<sub>pA1763-KPC</sub> (Figure 4), which also belonged to the above top five Inc groups.  
198 This finding suggests that these three IncFII<sub>pHN7A8</sub>-related Inc groups had phenotypic  
199 advantages relative to the other two top Inc groups.

200 We next examined the susceptibility/resistance profiles of 420 cpKp isolates to nine distinct  
201 classes of 21 different antibiotics (Figure S11, and Table S1). The capability of resistance to  
202 different antibiotic classes had the following tendency (high to low): the 249 CG258 isolates  
203 harboring the *bla*<sub>KPC</sub>-carrying plasmids of the three IncFII<sub>pHN7A8</sub>-related Inc groups > the 28  
204 CG258 isolates harboring those of IncFII<sub>p0716-KPC</sub>:Inc<sub>pA1763-KPC</sub> > the 33 non-CG258 isolates  
205 harboring those of IncFII<sub>pKPHS2</sub>:Inc<sub>pA1763-KPC</sub> (Figure 5a). This trend was also observed when the  
206 bacterial growth rates under antibiotic treatment were compared among the above groups of  
207 isolates (Figure 5b). In addition, we chose five representative *bla*<sub>KPC</sub>-carrying cpKP isolates  
208 each containing a single plasmid: G134 (ST11+IncFII<sub>pHN7A8</sub>), G285 (ST11+IncFII<sub>pHN7A8</sub>:IncR),  
209 G318 (ST11+IncFII<sub>pHN7A8</sub>:Inc<sub>pA1763-KPC</sub>), G165 (ST11+IncFII<sub>p0716-KPC</sub>:Inc<sub>pA1763-KPC</sub>) and G344  
210 (non-CG258+IncFII<sub>pKPHS2</sub>:Inc<sub>pA1763-KPC</sub>) for *in vitro* competitive assay. The results showed a  
211 similar tendency: the three IncFII<sub>pHN7A8</sub>-related Inc groups > IncFII<sub>p0716-KPC</sub>:Inc<sub>pA1763-KPC</sub> >  
212 IncFII<sub>pKPHS2</sub>:Inc<sub>pA1763-KPC</sub> (Figure 5c). Therefore, in relative to IncFII<sub>p0716-KPC</sub>:Inc<sub>pA1763-KPC</sub> and  
213 IncFII<sub>pKPHS2</sub>:Inc<sub>pA1763-KPC</sub>, the acquisition of three IncFII<sub>pHN7A8</sub>-related Inc groups of *bla*<sub>KPC</sub>-  
214 carrying plasmids rendered their host KP higher levels of antibiotic resistance, growth, and  
215 competition advantages. These phenotypic advantages might promote the nationwide spread of  
216 the dominant Clade 3 of CG258 cpKP in China.

217

218 **Optimized antibiotic combination regimens for cpKP treatment**

219 All of the cpKP isolates were resistant to  $\beta$ -lactams including carbapenems, whereas the  
220 resistant rates of these isolates to aminoglycosides [amikacin (47.86%, 201/420), tobramycin  
221 (57.62%, 242/420) and gentamicin (79.52%, 334/420)] and trimethoprim/sulfamethoxazole  
222 (65%, 273/420) were much lower (Figure S11a). For each of the ten antibiotics tested (Figure  
223 S11b), CG258 isolates displayed a much higher drug resistance rate than non-CG258. As shown  
224 by the number of antibiotic classes that the isolates were resistant to, CG258 showed much  
225 higher resistance levels than non-CG258 (Figure S12). Specifically, CG258 had the lowest  
226 resistance rates for amikacin (57.4%, 179/312) followed by trimethoprim/sulfamethoxazole  
227 (67.7%, 212/313) and tobramycin (73.2%, 202/276), while non-CG258 exhibited the lowest  
228 resistance for amikacin (20.6%, 22/107) followed by tobramycin (50.6%, 40/79) and  
229 levofloxacin (53.9%, 55/102) (Figure S11b). This large discrepancy of resistance profile  
230 between CG258 and non-CG258 led us to optimize the antibiotic combination regimens to treat  
231 CG258 and non-CG258.

232 Based on the calculated resistance ratios when different two-antibiotics combination  
233 regimens were used for CG258 treatment, two optimized combinations of  
234 ‘amikacin+trimethoprim/sulfamethoxazole’ and ‘tobramycin+trimethoprim/sulfamethoxazole’  
235 produced the resistance ratios of 32.59% (102/313) and 39.62% (124/313), respectively, which  
236 were much lower than the ratio of 57.4% (179/312) calculated for single-antibiotic ‘amikacin’  
237 (Figure 6a). In addition, the combinations of ‘amikacin+macroclantini’ and ‘amikacin+cefotetan’  
238 represented the two optimized two-antibiotics combination for non-CG258 treatment, with the  
239 resistance ratios of 13.08% (14/107) and 14.02% (15/107), respectively (Figure 6b).

240

## 241 **Discussion**

242 This study primarily revealed that the three host-plasmid ‘golden’ combinations played an  
243 important and even decisive role in the successfully clonal spread and dissemination of

244 ST11/CG258 cpKp in China. Here the three host-plasmid ‘golden’ combinations indicate the  
245 three main phylogenetic subclades of ST11/CG258 cpKp isolates carrying the three most  
246 prevalent Inc groups of KPC-producing plasmids: Clade 3.1+Clade 3.2 — IncFII<sub>pHN7A8</sub>, Clade  
247 3.1+Clade 3.2 — IncFII<sub>pHN7A8</sub>:IncR, Clade 3.3 — IncFII<sub>pHN7A8</sub>:Inc<sub>pA1763</sub>-KPC (Figure 3b and  
248 Figure 4b). We name them “golden combinations” due to the genotypic and phenotypic  
249 advantages of these isolates. On the one hand, our findings illustrated the genotypic advantages  
250 of the three host-plasmid ‘golden’ combinations in strong correlation and coevolution (Figure  
251 3a and Figure 4b); on the other hand, we demonstrated the phenotypic advantages of the three  
252 ‘golden’ combinations in drug-resistance, growth and competition (Figure 5). The genotypic  
253 and phenotypic advantages of the three host-plasmid ‘golden’ combinations are reciprocal  
254 causation, which improve the adaptability of the three IncFII<sub>pHN7A8</sub> families of plasmids to  
255 ST11/CG258 cpKp isolates, further leading to their successfully clonal spread and  
256 dissemination in China. Overall, they form a closed-loop process: the genotypic and phenotypic  
257 advantages of three host-plasmid ‘golden’ combinations, and their successful spread and  
258 dissemination in China (Figure 7).

259

260 **Three ‘golden’ combinations of host KP—*bla*<sub>KPC</sub>-carrying plasmid constitutes the major**  
261 **genetic basis (main internal cause) for the nationwide spread of ST11/CG258 cpKP in**  
262 **China**

263 Most cpKP isolates in China belong to the clonal group CG258 with ST11 as the dominant ST.  
264 In contrast, non-CG258 isolates had an overall non-clonal population structure with very high  
265 levels of genetic diversity. Our core-genome phylogenetic analysis identified Clade 3 as the  
266 dominant lineage. On the other hand, *bla*<sub>KPC</sub> was the dominant carbapenemase gene located in  
267 the plasmids of cpKP isolates. Among the five major Inc groups of *bla*<sub>KPC</sub>-harboring plasmids,  
268 a strong correlation of IncFII<sub>pHN7A8</sub>+IncFII<sub>pHN7A8</sub>:IncR, IncFII<sub>pHN7A8</sub>:Inc<sub>pA1763</sub>-KPC, and

269 IncFII<sub>p0716-KPC</sub>:Inc<sub>pA1763-KPC</sub> with CG258 Clade 3.1+3.2, Clade 3.3, and Clade 2.2+an unnamed  
270 subclade of Clade 1, respectively, were observed, while IncFII<sub>pKPHS2</sub>:Inc<sub>pA1763-KPC</sub> was highly  
271 associated with non-CG258.

272 The dissemination of CG258 cpKP in China was characteristic of a nationwide spread of the  
273 dominant Clade 3 since 2007-2008 (Figure 3b). A strong population expansion was observed  
274 for CG258 cpKP during 2007-2008, which was accompanied by the emergence of two host-  
275 plasmid ‘golden’ combinations at the same period: Clade 3.1+Clade 3.2 — IncFII<sub>pHN7A8</sub>, Clade  
276 3.1+Clade 3.2 —IncFII<sub>pHN7A8</sub>:IncR. In addition, the host-plasmid ‘golden’ combination, Clade  
277 3.3 — IncFII<sub>pHN7A8</sub>:Inc<sub>pA1763-KPC</sub> emerged at 2010. The expanded CG258 population retained at  
278 a high level with limited dynamic fluctuation, which was linked to the spread of Clade 3.1+3.2  
279 since 2007-2008 as well as that of Clade 3.3 since 2010 (Figure 3b and Figure 7).

280 Acquisition of *bla*<sub>KPC</sub>-carrying plasmids of IncFII<sub>pHN7A8</sub>, IncFII<sub>pHN7A8</sub>:IncR, and  
281 IncFII<sub>pHN7A8</sub>:Inc<sub>pA1763-KPC</sub> endowed their host KP isolates with phenotypes of a higher  
282 competitive growth rate and more antibiotic resistance, relative to those harboring IncFII<sub>p0716</sub>-  
283 KPC:Inc<sub>pA1763-KPC</sub> or IncFII<sub>pKPHS2</sub>:Inc<sub>pA1763-KPC</sub> (Figure 5). Remarkably, the evolution of three  
284 ‘golden’ combinations of host CG258—*bla*<sub>KPC</sub>-carrying plasmid (Clade 3.1+3.2—IncFII<sub>pHN7A8</sub>,  
285 Clade 3.1+3.2—IncFII<sub>pHN7A8</sub>:IncR, and Clade 3.3—IncFII<sub>pHN7A8</sub>:Inc<sub>pA1763-KPC</sub>) rendered them  
286 phenotypic advantages that might directly lead to their strong expansion and subsequent clonal  
287 dissemination since 2007-2008 in China.

288 In particular, more attention should be paid to the following two ‘golden’ combinations:  
289 Clade 3.1+3.2—IncFII<sub>pHN7A8</sub>:IncR, and Clade 3.3—IncFII<sub>pHN7A8</sub>:Inc<sub>pA1763-KPC</sub>, as they were  
290 ranked at the first (58.84%, 163/277) and second (20.94%, 58/277) percentages of CG258 cpKP  
291 isolates, respectively, and positioned at the farthest point from the root of the phylogenetic tree  
292 of CG258 cpKP isolates. Thus, they might represent the latest differentiation events and have  
293 the best host KP—plasmid adaptability, therefore, emerge as the highest risk lineages.

294  $\text{IncFII}_{\text{pHN7A8}}:\text{IncR}$  or  $\text{IncFII}_{\text{pHN7A8}}:\text{Inc}_{\text{pA1763-KPC}}$  plasmids are the chimeras of  $\text{IncFII}_{\text{pHN7A8}}$   
295 plasmids (carrying *bla*<sub>KPC</sub>) and  $\text{IncR}/\text{Inc}_{\text{pA1763-KPC}}$  plasmids (carrying multiple resistance genes)  
296 (22-25). Compared to single-replicon plasmids, multi-replicon plasmids have the advantages of  
297 rapid replication, replicon substitution, multiple partitioning and/or toxin-antitoxin systems for  
298 plasmid maintenance, and a high survival rate. The above two chimeric plasmids also possess  
299 additional unique advantages: i)  $\text{IncR}$  or  $\text{Inc}_{\text{pA1763-KPC}}$  backbones are very small, giving the low  
300 adaptability costs of the chimeras after their fusion with  $\text{IncFII}_{\text{pHN7A8}}$ ; ii)  $\text{IncR}$  or  $\text{Inc}_{\text{pA1763-KPC}}$   
301 plasmids carried large multidrug resistance regions, expanding the resistance profile of their  
302 hosts; and iii) although  $\text{IncR}$  or  $\text{Inc}_{\text{pA1763-KPC}}$  plasmids did not carry conjugation transfer regions,  
303 they can obtain self-transfer ability after fusion with conjugative  $\text{IncFII}_{\text{pHN7A8}}$  plasmids, further  
304 facilitating the spread of resistance genes they carried.

305

306 **Widespread use of carbapenems is the leading external cause for the expansion and**  
307 **prevalence of ST11/CG258 cpKp in China.**

308 Bacterial antibiotic resistance as a serious threat to public health is of the greatest concern in  
309 China. In addition to the genetic basis of three ‘golden’ combinations accounting for the  
310 population size change of CG258 cpKP, rapidly increased sales/use of carbapenems since 2005  
311 with the highest growth rate during 2007-2008 (Figure S13) constitutes the major external force  
312 driving antibiotic resistance, clonal expansion and consequently nationwide spread of  
313 ST11/CG258 cpKP in China.

314 Specifically, the consumption of Meropenem (a common carbapenem antibiotic) increased  
315 sharply from 2007 to 2009 (Figure S13). At the same period, some other carbapenems were  
316 listed in China and also facilitated their consumption (ertapenem: 2005, faropenem: 2006,  
317 biapenem: 2008). Overall, the rapid growth of carbapenem consumption around 2007 might  
318 directly led to the expansion of ST11/CG258 cpKP population. After 2007-08, the expansion of

319 cpKP population was restrained and entered a plateau (Figure 3a), which was mainly due to the  
320 slow growth of sales of carbapenems in China. Along with imposing restrictions on antibiotic  
321 prescription issued by the Ministry of Health of China since 2011, it has been reported that the  
322 use of antibiotics in many hospitals across the country has decreased significantly (26, 27). In  
323 addition, the Chinese government has introduced several policies to strictly control the usage  
324 of carbapenem antibiotics covering 1,429 hospitals (<http://www.chinets.com>).

325 In conclusion, the population change of ST11/CG258 cpKp isolates in China might be  
326 derived from the internal cause (three host-plasmid ‘golden’ combinations) and the external  
327 cause (widespread use of carbapenems). Exogenous variables could result in endogenous  
328 changes, and they worked together to facilitated the spread and prevalence of ST11/CG258  
329 cpKP isolates in China. Internal monitoring and external control should effectively inhibit the  
330 epidemic spread of cpKP isolates.

### 331 **Possibility of precision medication in clinic cpKP treatment**

332 Based on the susceptibility/resistance phenotypes to nine distinct classes of 21 different  
333 antibiotics, cpKP isolates in China displayed the lowest resistance rates for three  
334 aminoglycosides (amikacin, tobramycin, gentamicin) and trimethoprim/sulfamethoxazole.  
335 Similar results have also been reported in a wealth of literature (Table S6). Additionally, our  
336 findings revealed that CG258 cpKP has much broader resistance profiles than non-CG258 cpKP  
337 (Figure S12), which is supported by the epidemiological survey data of carbapenem-resistant  
338 *Enterobacteriaceae* from 2012 to 2016 in China (19). These findings make the possibility to  
339 optimize the two-antibiotics combination regimens for treatment of CG258 and non-CG258  
340 through calculating their resistance ratios when different antibiotic combinations are used. More  
341 importantly, cpKP with three ‘golden’ combinations showed the highest resistance profiles than  
342 other cpKP. More in-depth studies on different antibiotic combination regimens need to be  
343 executed for various cpKP genotypes with different Inc groups of plasmids, which will provide

344 a precise reference and a choice to treat cpKP infection by using the existing drugs effectively.

345 Eventually, we hope that our study can appeal for people to closely monitor the adaptability  
346 of resistant plasmids, so as to effectively prevent the emergence/dissemination of new ‘golden’  
347 host-plasmid combinations. Additionally, we should consider both genotypes (isolates) and Inc  
348 groups (drug-resistant plasmids) to achieve precision medication of cpKp infections.

349

## 350 **Materials and Methods**

### 351 **Bacterial isolates and genomic DNA extraction**

352 We collected 2,803 clinical *K. pneumoniae* isolates from 70 hospitals in 24 provinces of China  
353 from 2009 to 2017. After eliminating 59 culture failed isolates, 2,744 isolates were obtained for  
354 PCR detection of *K. pneumoniae*-specific *khe* gene to identify the species. After excluding the  
355 53 isolates without *khe* gene, 2,691 isoates were further tested to produce carbapenemases by  
356 Modified Carba NP test: 493 isolates were confirmed to produce carbapenemases. Bacterial  
357 genomic DNAs were then extracted using a Qiagen UltraClean Microbial DNA Isolation Kit,  
358 which were sequenced by Illumina technology. After excluding 73 low-quality sequencing  
359 sample, 420 cpKP genomes were used for the subsequent analysis (Table S1).

360

### 361 **Genome sequencing and assembly**

362 The draft genome sequences of bacterial genomic DNA were sequenced from a paired-end  
363 library with an average insert size of 350 bp on an Illumina HiSeq2000 sequencing platform  
364 (28). Adapters and low-quality reads were removed using *FASTX-Toolkit*  
365 ([http://hannonlab.cshl.edu/fastx\\_toolkit/](http://hannonlab.cshl.edu/fastx_toolkit/)). *SPAdes* v3.9.0 (29) was used to do the *de novo*  
366 assembly from the trimmed sequence reads using *k*-mer sizes of 21, 33, 55 and the -cov-cutoff  
367 flag set to ‘auto’. Isolates were discarded through the following analyses: i) if the size of the *de*  
368 *novo* assembly was outside of 5-7 Mb, ii) if the average nucleotide identity to NJST258\_1 was

369 lower than 95% or the top match was not NJST258\_1 after the *de novo* assembly was compared  
370 with the reference genomes of five *Klebsiella* spp. (*K. pneumoniae* NJST258\_1, CP006923; *K.*  
371 *quasipneumoniae* ATCC 700603, CP014696; *K. michiganensis* E718, NC\_018106; *K. oxytoca*  
372 CAV1374, CP011636; *K. variicola* DSM 15968, CP010523) using *Pyani-0.2.7* (30), and iii) if  
373 the percentage of the total number of genomic sites with more than 10-fold depth of coverage  
374 was lower than 80% after the raw sequencing reads of each isolate were mapped to the  
375 NJST258\_1 genome using *Bowtie2* (31) and the depth of coverage for each position on the  
376 genome were calculated using *samtools depth* v0.1.19 (32).

377 The complete genome sequences was obtained from a sheared DNA library with an average  
378 size of 10 kb on a PacBio RSII sequencer (Pacific Biosciences) (33), and the *de novo* sequence  
379 assembly was performed using *SMRT Analysis* v2.3.0 ([https://smrt-](https://smrt-analysis.readthedocs.io/en/latest/)  
380 [analysis.readthedocs.io/en/latest/](https://smrt-analysis.readthedocs.io/en/latest/)). Nanopore GridION platform was also used for whole-  
381 genome sequencing (34), and the high-quality reads (mean\_qscore\_template  $\geq 7$  and length  $\geq$   
382 1,000) were screened for further *de novo* sequence assembly using *canu*  
383 (<https://canu.readthedocs.io/en/latest/>) (35). Circularization of chromosomal or plasmid  
384 sequences was achieved by manual comparison. *Pilon* v.1.13 (36) was employed to polish  
385 complete genome sequences using Illumina sequencing reads.

386

### 387 **MLST**

388 *SRST2* (37) was used to identify the ST of each KP isolate by mapping its Illumina sequencing  
389 reads to the Pasteur *Klebsiella* MLST Database  
390 (<http://bigsd.b.pasteur.fr/klebsiella/klebsiella.html>). All the STs in the *Klebsiella* MLST  
391 database (last accessed August 3, 2018) were assigned to different CGs using *eBURST* (38).

392

### 393 **Construction of maximum-likelihood clustering trees**



394 Chromosome sequences were mapped to a reference sequence of NJST258\_1 (11) using  
395 *Bowtie2* (31). The core SNPs of the 2,300 global KP isolates were identified using *Mummer*  
396 v3.25 (39) , and the core SNPs of our 420 cpKp isolates were called using *GATK Unified*  
397 *Genotyper* (40). We filtered all the SNPs in the repetitive DNA regions (identified by  
398 *RepeatMasker*, <http://www.repeatmasker.org/>) and the mobile genetic elements (including  
399 insertion sequences, transposons, integrons, and phage-related genes). Based on the above core  
400 SNPs, the maximum-likelihood clustering trees of the 2,300 global KP isolates and our 420  
401 cpKp isolates were constructed using *FastTree* V2.1.9 (41) and *RAxML* (42), respectively  
402 (Bootstrap value: 500).

403

#### 404 **Construction of recombination-free Bayesian phylogenetic tree**

405 Our 313 CG258 cpKP isolates were subjective to sequence alignment. Recombination DNA  
406 regions were predicted using *ClonalFrameML* (43), followed by removal of all putative  
407 recombinant SNP sites. A Bayesian phylogenetic tree was constructed from the recombination-  
408 free core SNPs of the resulting 233 non-redundant CG258 cpKP isolates using *MrBayes* (44)  
409 and visualized using *iTOL* (<https://itol.embl.de/>).

410

#### 411 **Bayesian phylogenetic inference and molecular dating analyses**

412 Bayesian skyline analysis was performed to calculate the change in the effective population  
413 size of the above 233 isolates using *BEAST* v1.8.4 (45). The three standard substitution models,  
414 Hasegawa-Kishino-Yano (HKY), general time-reversible (GTR), and Tamura-Nei 93 (TN93)  
415 was tested in combination with the estimated/empirical base frequency, the gamma (G) site  
416 heterogeneity and the loose molecular clock. By testing various parameter combinations, the  
417 model combination GTR+empirical+G4 was selected. The tip date was defined as the sampling  
418 time. In the end, three independent chains of  $5 \times 10^7$  generations were run to ensure calculation

419 accuracy, with sampling every 1,000 iterations. The resulting Bayesian skyline plot was  
420 visualized using *Tracer* v1.7 (46). A time-calibrated Bayesian MCC tree of the above 233  
421 isolates was constructed using *TreeAnnotator* (<https://beast.community/treeannotator>) and  
422 visualized using *FigTree* (<http://tree.bio.ed.ac.uk/software/figtree/>).

423

#### 424 **Plasmid analysis**

425 All the fully sequenced *bla*<sub>KPC</sub>-carrying plasmids from GenBank (last accessed Aug 29, 2018)  
426 and our study were used as the references. The draft sequences of the rest *bla*<sub>KPC</sub>-carrying  
427 plasmids in our 420 cpKp isolates were aligned using *BLAST* (47) and custom *Perl* scripts. Inc  
428 groups and core backbone *rep* and *par* genes were determined for all the *bla*<sub>KPC</sub>-carrying  
429 plasmids in our 420 cpKp isolates. To ensure accuracy, the assembled draft plasmid sequences  
430 met the following three criteria (48): the *bla*<sub>KPC</sub>-embedded contigs had 100% query coverage  
431 and  $\geq 99\%$  identity with corresponding reference plasmids; the *bla*<sub>KPC</sub>-embedded contigs and  
432 the *rep*-embedded contigs of the same plasmid had similar sequencing depths; each draft  
433 plasmid sequence had  $\geq 70\%$  Query coverage and  $\geq 94\%$  identity with corresponding reference  
434 plasmids.

435

#### 436 **Identification of carbapenemase genes**

437 The major plasmid-borne carbapenemase genes were screened for each cpKP isolate by PCR,  
438 followed by amplicon sequencing using ABI 3730 Sequencer (49). The variants of *bla*<sub>KPC</sub>,  
439 *bla*<sub>NDM</sub>, and *bla*<sub>IMP</sub> were identified from genome sequence data using *ResFinder* (50).

440

#### 441 **Bacterial phenotypic resistance assays**

442 Bacterial antimicrobial susceptibility was tested by BioMérieux VITEK 2 and interpreted based  
443 on the 2018 Clinical and Laboratory Standards Institute (CLSI) guidelines (51). The activity of

444 Ambler class A/B/D carbapenemases in bacterial cell extracts was determined by a modified  
445 CarbaNP test (49).

446

#### 447 **Bacterial growth curves**

448 Bacterial growth curves were measured on a 96 well-microtitre plate using a Thermo Scientific  
449 Multiskan FC instrument. Equivalent amount of overnight bacterial culture was inoculated in  
450 each well containing 200 µl of LB liquid medium (4 mg/L meropenem), and the mixtures were  
451 cultured at 37°C overnight with a speed of 5 Hz. The bacterial growth curve was determined  
452 through a course of time by recording the turbidity at 600 nm using the microplate reader of the  
453 Multiskan FC instrument. Experiments were performed in triplicate.

454

#### 455 ***In vitro* competition experiments**

456 Equivalent amount of overnight bacterial cultures of two indicated bacterial isolates were  
457 inoculated into 10 ml of LB liquid medium (4 mg/L meropenem), and the mixtures were  
458 cultured at 37°C for 72 h in a shaker with a speed of 200 rpm. At 0, 24, 48, and 72h, 3 mL  
459 aliquots of the cultures were taken, and genomic DNAs were extracted. To examine the  
460 competition between two bacterial isolates, real-time qPCRs were performed to determine the  
461 ratio of Ct values between each of the four ST11/CG258 isolates (G134, G285, G318, and G165)  
462 and the control non-CG258 isolate G344. The five genes G134\_05212, G285\_01367,  
463 G318\_02254, G165\_02217, and G344\_00764 were selected as PCR target sequences, and the  
464 corresponding PCR primers were listed in Table S7. Experiments were performed in triplicate.

465

#### 466 **Data availability**

467 The genome sequences in this study were submitted to Genome Sequence Archive under  
468 accession number CRA003059. Individual accession numbers for sequence data were also

469 available in Table S1.

470

#### 471 **Author Contributions**

472 DZ and FC conceived the study. CL and TY performed the bioinformatics analyses. XJ, YJ, LY,  
473 GM, ZY, YJ, XL, and XW carried out the experimental analyses. CL, XJ, TY, XY, and SL drew  
474 the figures. DZ, FC, and CL wrote the manuscript. All authors read and approved the final  
475 manuscript.

476

#### 477 **Funding**

478 This work was supported by National Key R&D Program of China (2018YFC1200100),  
479 National Science and Technology Major Project of China (2018ZX10302-301-004-003), and  
480 National Natural Science Foundation of China (31770870).

481

#### 482 **Competing interest statement**

483 The authors declare no competing interests.

484

## References

- 485 1. De Oliveira DMP, Forde BM, Kidd TJ, Harris PNA, Schembri MA, Beatson SA, et al. Antimicrobial  
486 resistance in ESKAPE pathogens. *Clin Microbiol Rev.* 2020;33(3).
- 487 2. Petrosillo N, Giannella M, Lewis R, Viale P. Treatment of carbapenem-resistant *Klebsiella pneumoniae*: the  
488 state of the art. *Expert Rev Anti Infect Ther.* 2013;11(2):159-77.
- 489 3. Tzouvelekis LS, Markogiannakis A, Psychogiou M, Tassios PT, Daikos GL. Carbapenemases in *Klebsiella*  
490 *pneumoniae* and other Enterobacteriaceae: an evolving crisis of global dimensions. *Clin Microbiol Rev.*  
491 2012;25(4):682-707.
- 492 4. Nordmann P, Cuzon G, Naas T. The real threat of *Klebsiella pneumoniae* carbapenemase-producing bacteria.  
493 *Lancet Infect Dis.* 2009;9(4):228-36.
- 494 5. Gupta N, Limbago BM, Patel JB, Kallen AJ. Carbapenem-resistant Enterobacteriaceae: epidemiology and  
495 prevention. *Clin Infect Dis.* 2011;53(1):60-7.
- 496 6. Tacconelli E, Carrara E, Savoldi A, Harbarth S, Mendelson M, Monnet DL, et al. Discovery, research, and  
497 development of new antibiotics: the WHO priority list of antibiotic-resistant bacteria and tuberculosis. *Lancet*  
498 *Infect Dis.* 2018;18(3):318-27.
- 499 7. Munoz-Price LS, Poirel L, Bonomo RA, Schwaber MJ, Daikos GL, Cormican M, et al. Clinical epidemiology  
500 of the global expansion of *Klebsiella pneumoniae* carbapenemases. *Lancet Infect Dis.* 2013;13(9):785-96.
- 501 8. David S, Cohen V, Reuter S, Sheppard AE, Giani T, Parkhill J, et al. Integrated chromosomal and plasmid  
502 sequence analyses reveal diverse modes of carbapenemase gene spread among *Klebsiella pneumoniae*. *Proc Natl*  
503 *Acad Sci U S A.* 2020;117(40):25043-54.
- 504 9. Chen L, Mathema B, Chavda KD, DeLeo FR, Bonomo RA, Kreiswirth BN. Carbapenemase-producing  
505 *Klebsiella pneumoniae*: molecular and genetic decoding. *Trends Microbiol.* 2014;22(12):686-96.
- 506 10. Li B, Feng J, Zhan Z, Yin Z, Jiang Q, Wei P, et al. Dissemination of KPC-2-Encoding IncX6 plasmids among  
507 multiple Enterobacteriaceae species in a single Chinese hospital. *Front Microbiol.* 2018;9:478.
- 508 11. Deleo FR, Chen L, Porcella SF, Martens CA, Kobayashi SD, Porter AR, et al. Molecular dissection of the  
509 evolution of carbapenem-resistant multilocus sequence type 258 *Klebsiella pneumoniae*. *Proc Natl Acad Sci U S*  
510 *A.* 2014;111(13):4988-93.
- 511 12. Rojas LJ, Weinstock GM, De La Cadena E, Diaz L, Rios R, Hanson BM, et al. An Analysis of the epidemic  
512 of *Klebsiella pneumoniae* carbapenemase-producing *K. pneumoniae*: convergence of two evolutionary  
513 mechanisms creates the "Perfect Storm". *J Infect Dis.* 2017;217(1):82-92.
- 514 13. David S, Reuter S, Harris SR, Glasner C, Feltwell T, Argimon S, et al. Epidemic of carbapenem-resistant  
515 *Klebsiella pneumoniae* in Europe is driven by nosocomial spread. *Nat Microbiol.* 2019;4(11):1919-29.
- 516 14. Arena F, Di Pilato V, Vannetti F, Fabbri L, Antonelli A, Coppi M, et al. Population structure of KPC  
517 carbapenemase-producing *Klebsiella pneumoniae* in a long-term acute-care rehabilitation facility: identification  
518 of a new lineage of clonal group 101, associated with local hyperendemicity. *Microb Genom.* 2020;6(1).
- 519 15. Dong N, Zhang R, Liu L, Li R, Lin D, Chan EW, et al. Genome analysis of clinical multilocus sequence Type  
520 11 *Klebsiella pneumoniae* from China. *Microb Genom.* 2018;4(2).
- 521 16. Chen L, Mathema B, Pitout JD, DeLeo FR, Kreiswirth BN. Epidemic *Klebsiella pneumoniae* ST258 is a  
522 hybrid strain. *mBio.* 2014;5(3):e01355-14.
- 523 17. Wyres KL, Holt KE. *Klebsiella pneumoniae* population genomics and antimicrobial-resistant clones. *Trends*  
524 *Microbiol.* 2016;24(12):944-56.
- 525 18. Qi Y, Wei Z, Ji S, Du X, Shen P, Yu Y. ST11, the dominant clone of KPC-producing *Klebsiella pneumoniae*  
526 in China. *J Antimicrob Chemother.* 2011;66(2):307-12.
- 527 19. Wang Q, Wang X, Wang J, Ouyang P, Jin C, Wang R, et al. Phenotypic and genotypic characterization of

- 528 carbapenem-resistant Enterobacteriaceae: data from a longitudinal large-scale CRE study in China (2012-2016).  
529 Clin Infect Dis. 2018;67(suppl\_2):S196-S205.
- 530 20. Zhang R, Liu L, Zhou H, Chan EW, Li J, Fang Y, et al. Nationwide surveillance of clinical carbapenem-  
531 resistant Enterobacteriaceae (CRE) strains in China. EBioMedicine. 2017;19:98-106.
- 532 21. Stoesser N, Phan HTT, Seale AC, Aiken Z, Thomas S, Smith M, et al. Genomic epidemiology of complex,  
533 multispecies, plasmid-borne *bla*<sub>KPC</sub> carbapenemase in Enterobacterales in the United Kingdom from 2009 to 2014.  
534 Antimicrob Agents Chemother. 2020;64(5).
- 535 22. Qu D, Shen Y, Hu L, Jiang X, Yin Z, Gao B, et al. Comparative analysis of KPC-2-encoding chimera plasmids  
536 with multi-replicon IncR:IncpA1763-KPC:IncN1 or IncFIIpHN7A8:IncpA1763-KPC:IncN1. Infect Drug Resist.  
537 2019;12:285-96.
- 538 23. He L, Partridge SR, Yang X, Hou J, Deng Y, Yao Q, et al. Complete nucleotide sequence of pHN7A8, an  
539 F33:A-B- type epidemic plasmid carrying blaCTX-M-65, fosA3 and rmtB from China. J Antimicrob Chemother.  
540 2013;68(1):46-50.
- 541 24. Shi L, Feng J, Zhan Z, Zhao Y, Zhou H, Mao H, et al. Comparative analysis of blaKPC-2- and rmtB-carrying  
542 IncFII-family pKPC-LK30/pHN7A8 hybrid plasmids from Klebsiella pneumoniae CG258 strains disseminated  
543 among multiple Chinese hospitals. Infect Drug Resist. 2018;11:1783-93.
- 544 25. Jing Y, Jiang X, Yin Z, Hu L, Zhang Y, Yang W, et al. Genomic diversification of IncR plasmids from China.  
545 J Global Antimicrob Resist. 2019;19:358-64.
- 546 26. Bao L, Peng R, Wang Y, Ma R, Ren X, Meng W, et al. Significant reduction of antibiotic consumption and  
547 patients' costs after an action plan in China, 2010-2014. PLoS One. 2015;10(3):e0118868.
- 548 27. Sun J, Shen X, Li M, He L, Guo S, Skoog G, et al. Changes in patterns of antibiotic use in Chinese public  
549 hospitals (2005-2012) and a benchmark comparison with Sweden in 2012. J Glob Antimicrob Resist.  
550 2015;3(2):95-102.
- 551 28. Ribeiro FJ, Przybylski D, Yin S, Sharpe T, Gnerre S, Abouelleil A, et al. Finished bacterial genomes from  
552 shotgun sequence data. Genome Res. 2012;22(11):2270-7.
- 553 29. Bankevich A, Nurk S, Antipov D, Gurevich AA, Dvorkin M, Kulikov AS, et al. SPAdes: a new genome  
554 assembly algorithm and its applications to single-cell sequencing. J Comput Biol. 2012;19(5):455-77.
- 555 30. Pritchard L, Glover RH, Humphris S, Elphinstone JG, Toth IK. Genomics and taxonomy in diagnostics for  
556 food security: soft-rotting enterobacterial plant pathogens. Analytical Methods. 2016;8(1):12-24.
- 557 31. Langmead B, Salzberg SL. Fast gapped-read alignment with Bowtie 2. Nat Methods. 2012;9(4):357-9.
- 558 32. Li H, Handsaker B, Wysoker A, Fennell T, Ruan J, Homer N, et al. The Sequence Alignment/Map format and  
559 SAMtools. Bioinformatics. 2009;25(16):2078-9.
- 560 33. Zhu L, Zhong J, Jia X, Liu G, Kang Y, Dong M, et al. Precision methylome characterization of  
561 Mycobacterium tuberculosis complex (MTBC) using PacBio single-molecule real-time (SMRT) technology.  
562 Nucleic Acids Res. 2016;44(2):730-43.
- 563 34. Jain M, Olsen HE, Paten B, Akeson M. The Oxford Nanopore MinION: delivery of nanopore sequencing to  
564 the genomics community. Genome Biol. 2016;17(1):239.
- 565 35. Koren S, Walenz BP, Berlin K, Miller JR, Bergman NH, Phillippy AM. Canu: scalable and accurate long-  
566 read assembly via adaptive k-mer weighting and repeat separation. Genome Res. 2017;27(5):722-36.
- 567 36. Walker BJ, Abeel T, Shea T, Priest M, Abouelliel A, Sakthikumar S, et al. Pilon: an integrated tool for  
568 comprehensive microbial variant detection and genome assembly improvement. PLoS One. 2014;9(11):e112963.
- 569 37. Inouye M, Dashnow H, Raven LA, Schultz MB, Pope BJ, Tomita T, et al. SRST2: Rapid genomic surveillance  
570 for public health and hospital microbiology labs. Genome Med. 2014;6(11):90.
- 571 38. Feil EJ, Li BC, Aanensen DM, Hanage WP, Spratt BG. eBURST: inferring patterns of evolutionary descent

- 572 among clusters of related bacterial genotypes from multilocus sequence typing data. *J Bacteriol.*  
573 2004;186(5):1518-30.
- 574 39. Bortz DM, Jackson TL, Taylor KA, Thompson AP, Younger JG. *Klebsiella pneumoniae* flocculation  
575 dynamics. *Bull Math Biol.* 2008;70(3):745-68.
- 576 40. McKenna A, Hanna M, Banks E, Sivachenko A, Cibulskis K, Kernytsky A, et al. The Genome Analysis  
577 Toolkit: a MapReduce framework for analyzing next-generation DNA sequencing data. *Genome Res.*  
578 2010;20(9):1297-303.
- 579 41. Price MN, Dehal PS, Arkin AP. FastTree: computing large minimum evolution trees with profiles instead of  
580 a distance matrix. *Mol Biol Evol.* 2009;26(7):1641-50.
- 581 42. Stamatakis A. RAxML-VI-HPC: maximum likelihood-based phylogenetic analyses with thousands of taxa  
582 and mixed models. *Bioinformatics.* 2006;22(21):2688-90.
- 583 43. Didelot X, Wilson DJ. ClonalFrameML: efficient inference of recombination in whole bacterial genomes.  
584 *PLoS Comput Biol.* 2015;11(2):e1004041.
- 585 44. Ronquist F, Teslenko M, van der Mark P, Ayres DL, Darling A, Höhna S, et al. MrBayes 3.2: efficient  
586 Bayesian phylogenetic inference and model choice across a large model space. *Syst Biol.* 2012;61(3):539-42.
- 587 45. Suchard MA, Lemey P, Baele G, Ayres DL, Drummond AJ, Rambaut A. Bayesian phylogenetic and  
588 phylodynamic data integration using BEAST 1.10. *Virus Evol.* 2018;4(1):vey016.
- 589 46. Rambaut A, Drummond AJ, Xie D, Baele G, Suchard MA. Posterior Summarization in Bayesian  
590 Phylogenetics Using Tracer 1.7. *Syst Biol.* 2018;67(5):901-4.
- 591 47. Camacho C, Coulouris G, Avagyan V, Ma N, Papadopoulos J, Bealer K, et al. BLAST+: architecture and  
592 applications. *BMC Bioinformatics.* 2009;10:421.
- 593 48. Cerqueira GC, Earl AM, Ernst CM, Grad YH, Dekker JP, Feldgarden M, et al. Multi-institute analysis of  
594 carbapenem resistance reveals remarkable diversity, unexplained mechanisms, and limited clonal outbreaks. *Proc*  
595 *Natl Acad Sci U S A.* 2017;114(5):1135-40.
- 596 49. Feng J, Qiu Y, Yin Z, Chen W, Yang H, Yang W, et al. Coexistence of a novel KPC-2-encoding MDR plasmid  
597 and an NDM-1-encoding pNDM-HN380-like plasmid in a clinical isolate of *Citrobacter freundii*. *J Antimicrob*  
598 *Chemother.* 2015;70(11):2987-91.
- 599 50. Zankari E, Hasman H, Cosentino S, Vestergaard M, Rasmussen S, Lund O, et al. Identification of acquired  
600 antimicrobial resistance genes. *J Antimicrob Chemother.* 2012;67(11):2640-4.
- 601 51. CLSI. Performance Standards for Antimicrobial Susceptibility Testing: Wayne, PA: Clinical and Laboratory  
602 Standards Institute; 2018.  
603

604 **Figures**

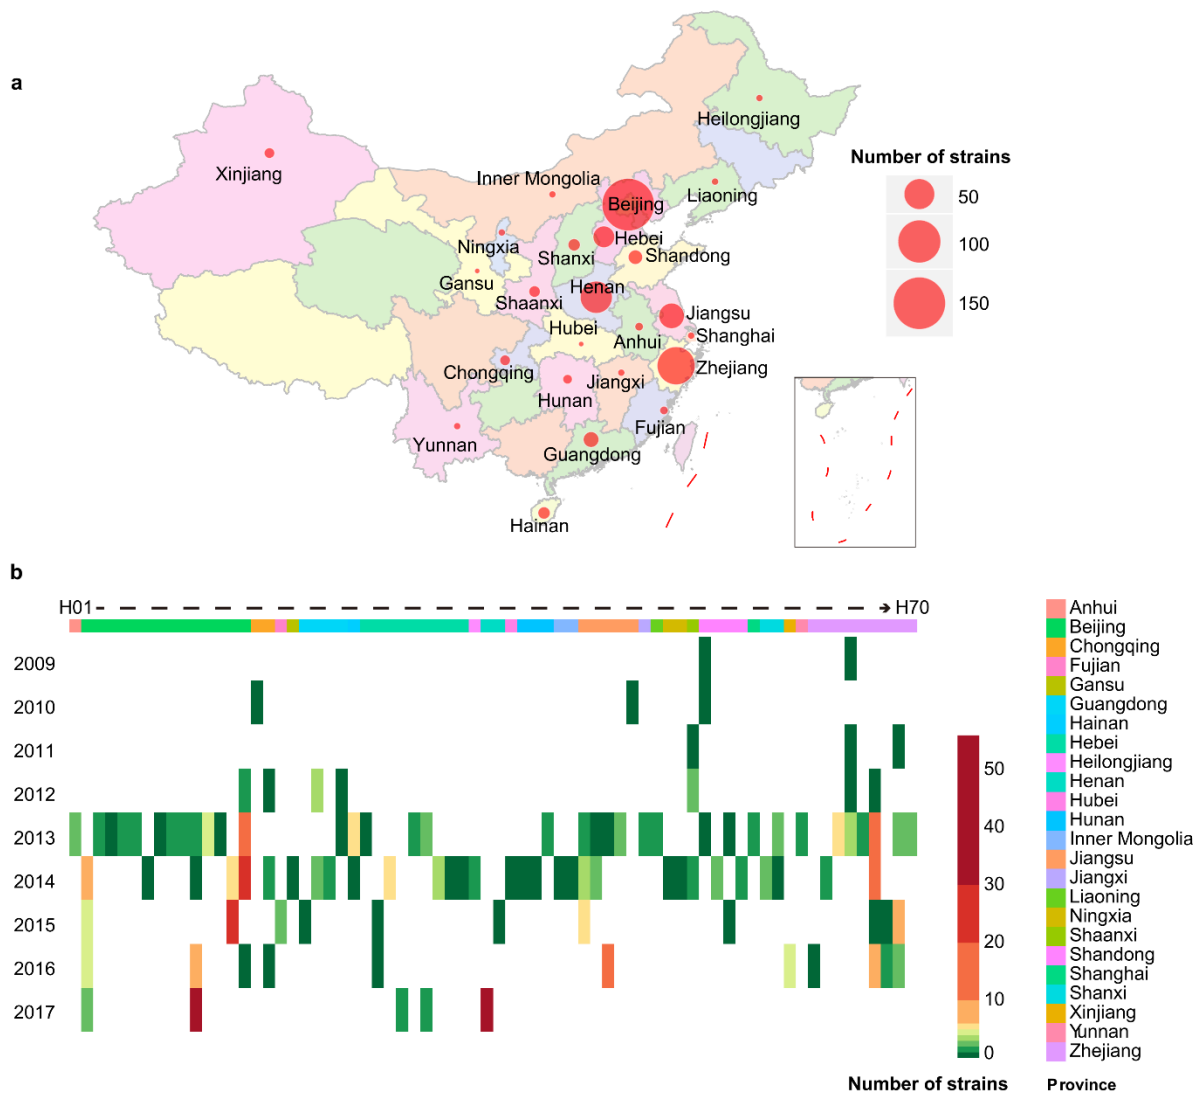

605

606 **Fig. 1|Spatial-temporal distribution of cpKP isolates from China. a,** Distribution of our 420

607 cpKP isolates in different provinces. **b,** Distribution of the 420 cpKP isolates in different years

608 and hospitals. The red circles (a) and color palettes (b) indicated the numbers of isolates.

609 Hospital H1 to H70 (b) could be assigned to different provinces in different colors.



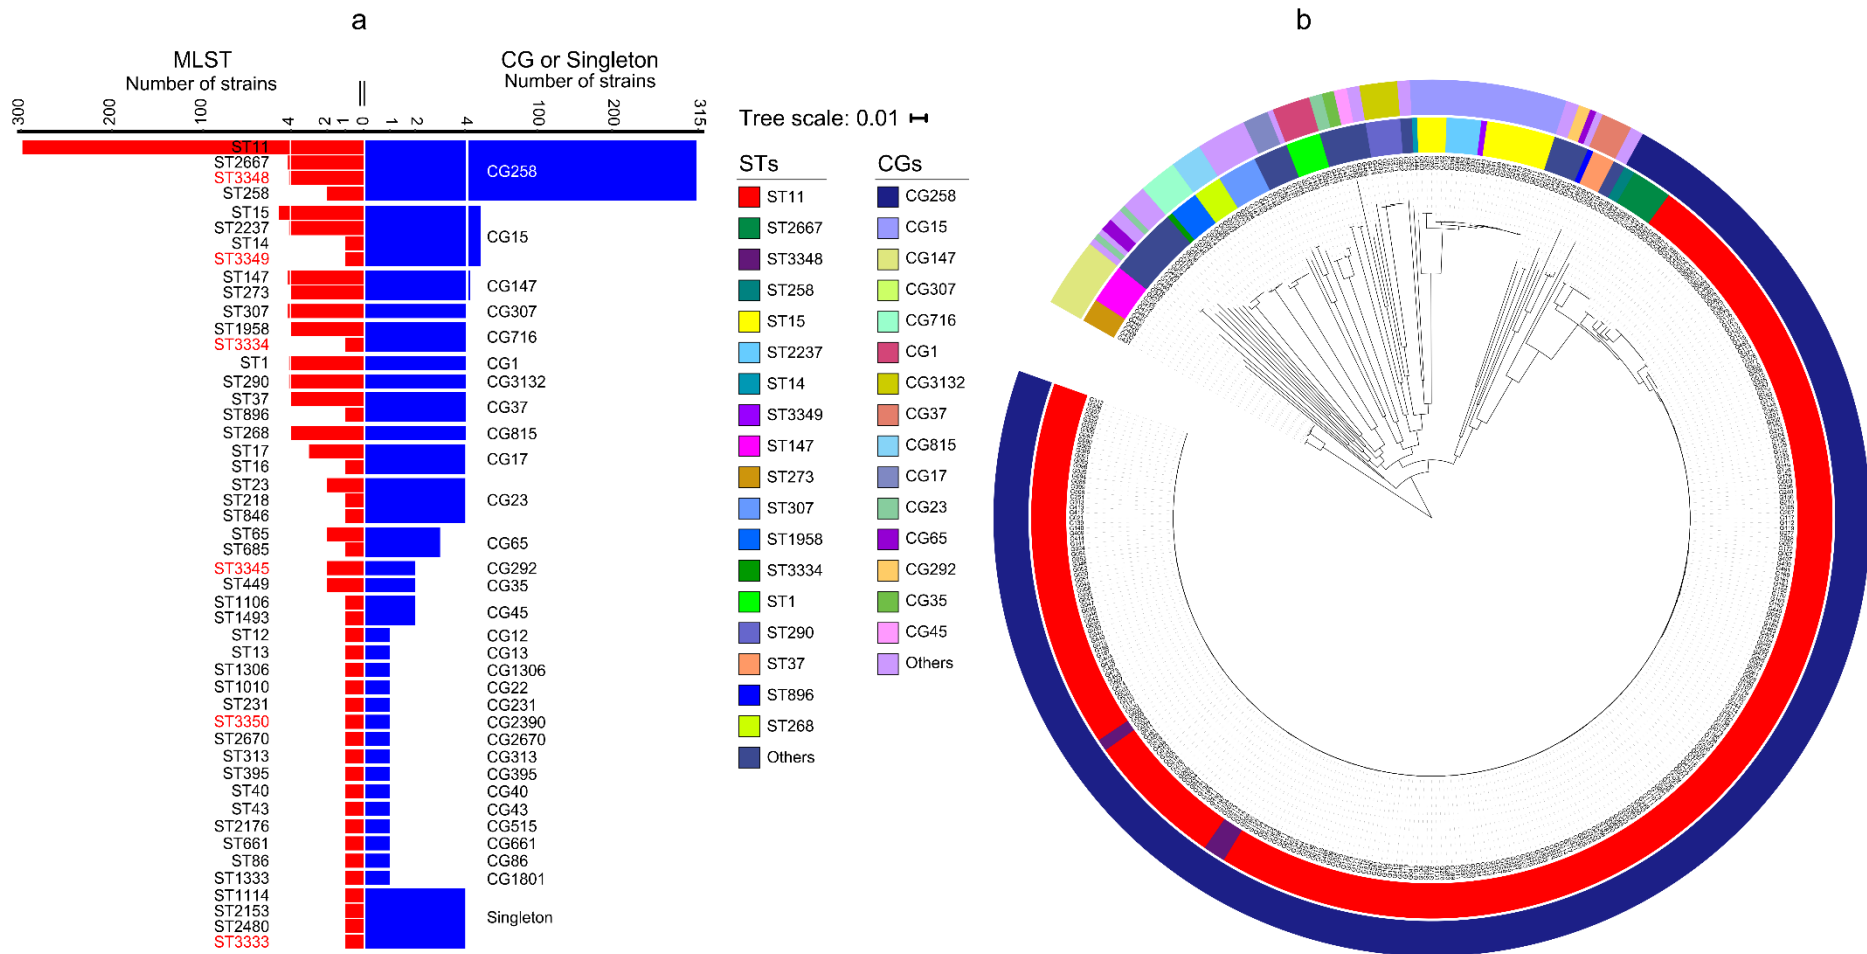

610

611 **Fig. 2|MLST and clustering tree of cpKP isolates. a**, A profile of STs, CGs, and singletons of our 420 cpKp isolates. These 420 isolates consisted  
 612 of 313 CG258 ones and 107 non-CG258 ones. The six novel STs identified in this study were highlighted in red. **b**, A maximum-likelihood  
 613 clustering tree based on the 69,880 core SNPs of the 420 cpKp isolates. *K. variicola* isolate DSM 15968 was used as the outgroup but not shown

614 in the tree. The outer and inner circles in the tree indicated CGs and STs, respectively.

615

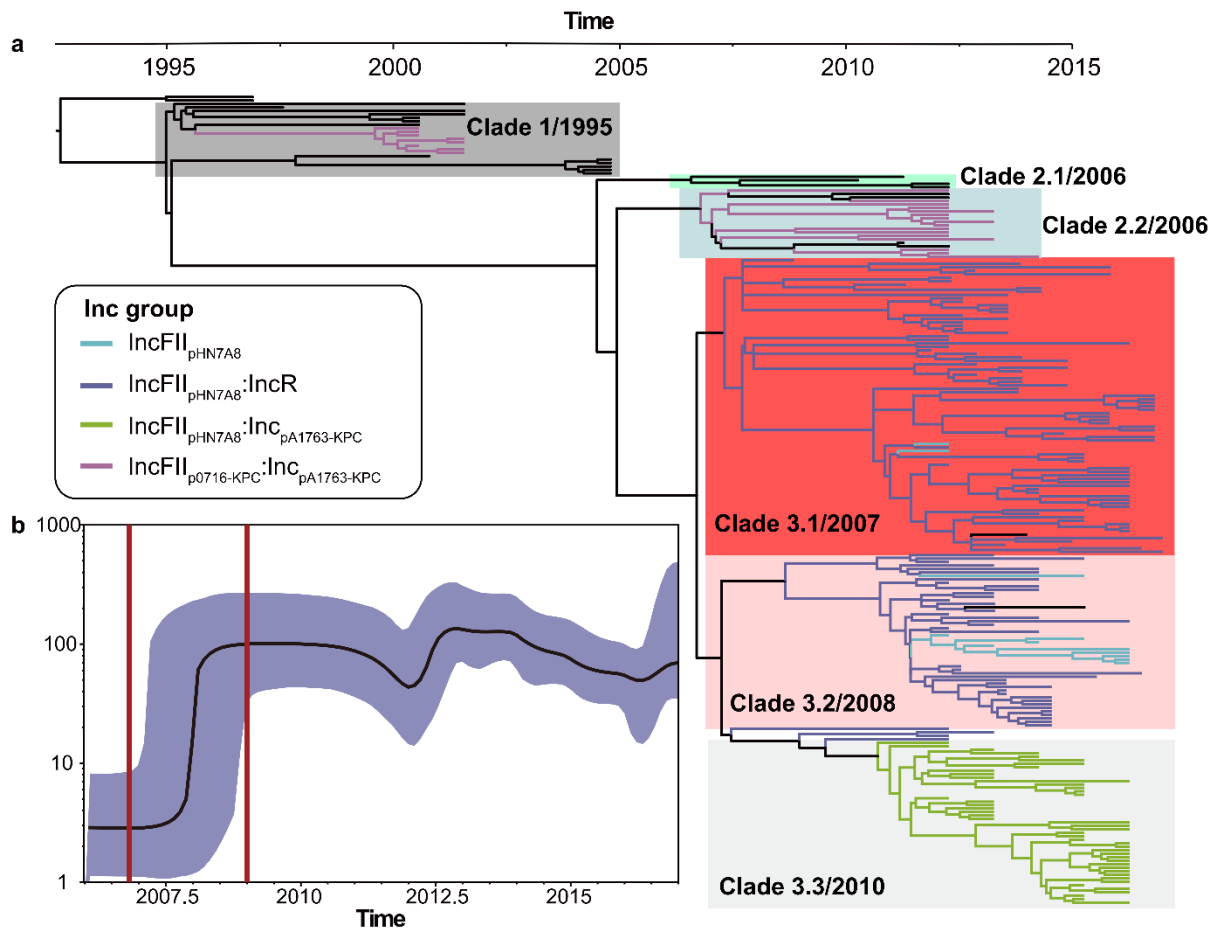

616

617 **Fig. 3|Evolutionary history of CG258 cpKP isolates. a,** A time-calibrated MCC Bayesian  
618 phylogeny based on the 1,271 recombination-free core SNPs. These SNPs came from our 233  
619 non-redundant CG258 cpKP isolates that were shrunk from the total collection of 313 CG258  
620 cpKP ones (see main text). The isolates carrying different Inc groups of blaKPC-carrying  
621 plasmids were denoted as distinct colored clusters in the tree. **b,** A Bayesian skyline of the  
622 effective population size of the 233 CG258 cpKP isolates. Shadow region indicated 95%  
623 probability density interval of estimated population size.

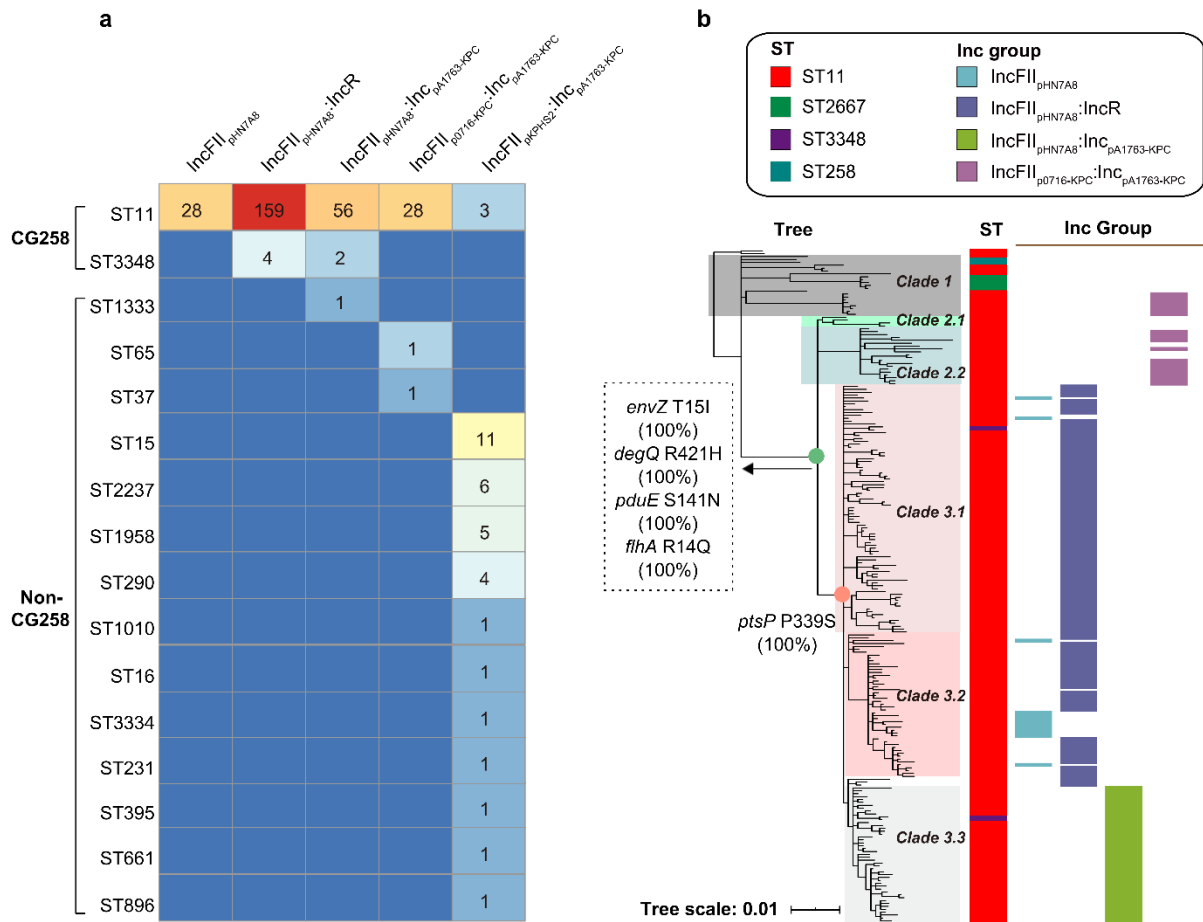

624

625 **Fig. 4|Correlation of different Inc groups of *bla*<sub>KPC</sub>-carrying plasmids with CG258 and**

626 **non-CG258. a, Prevalence of the top five Inc groups (Table S4) among our CG258 and non-**

627 **CG258 cpKp isolates. The numbers in the cells represented numbers of cpKp isolates (316 in**

628 **total). b, Association of the four Inc groups with different clades of CG258. The tree was the**

629 **Bayesian tree of the 233 CG258 cpKp isolates. The SNPs on the nodes indicated some specific**

630 **markers for the accurate classification of Clade 1, 2, and 3 of ST11/CG258 cpKP isolates.**

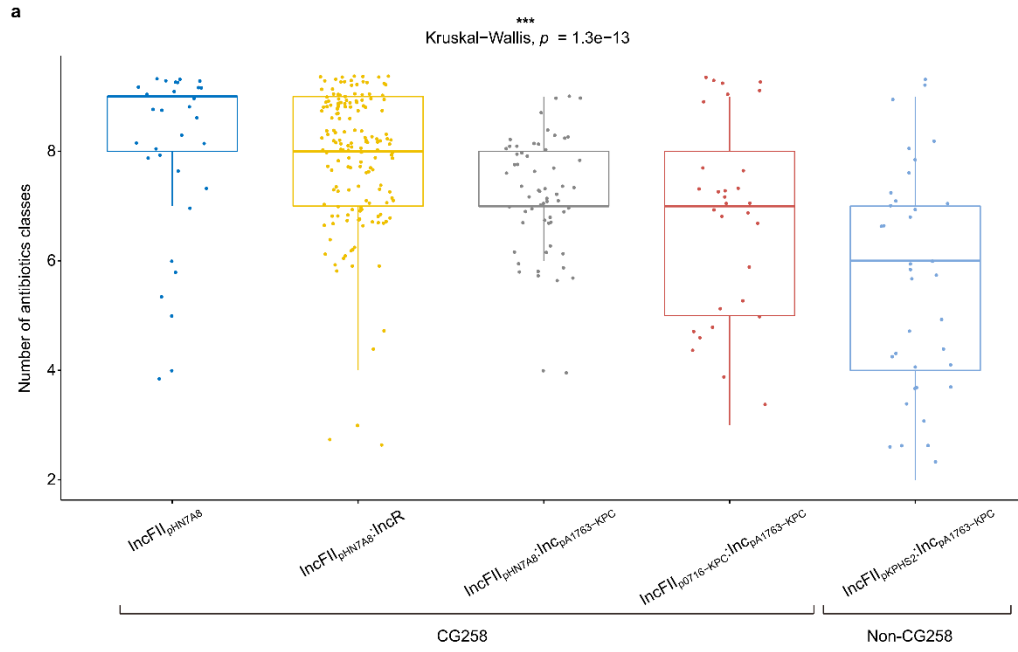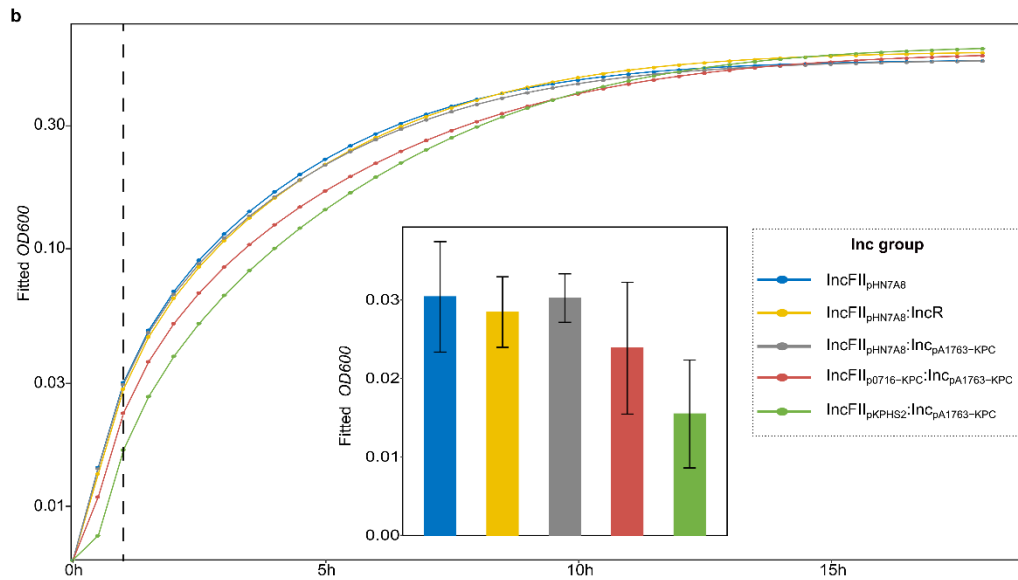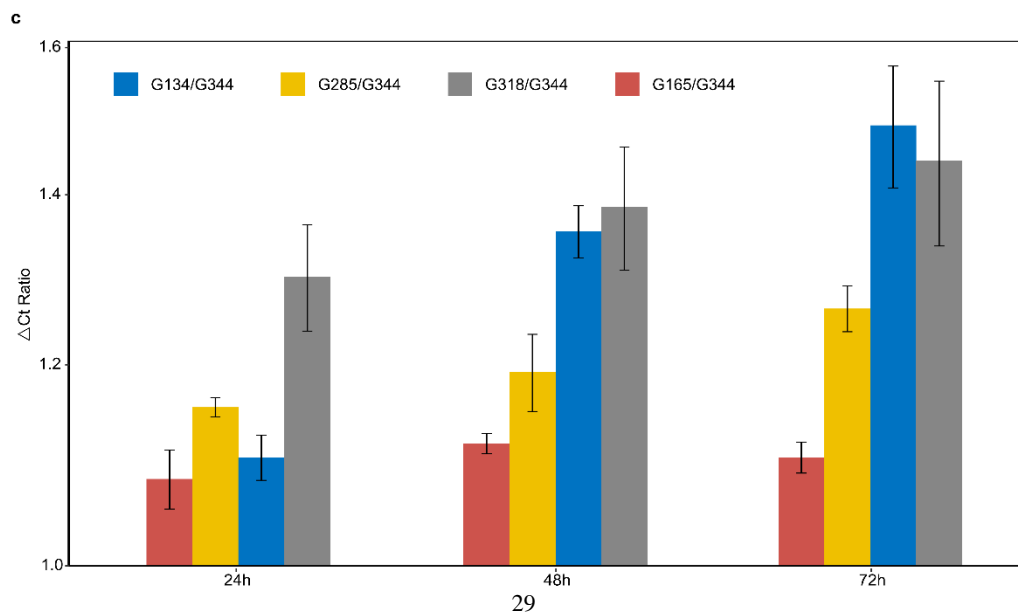

632 **Fig. 5| Resistance, growth, and competition advantages of cpKP harboring *bla*<sub>KPC</sub>-**  
633 **carrying plasmids of different Inc groups. a,** Boxplots showed the numbers of classes of  
634 antibiotics that different subgroups of cpKP isolates were resistant to. The *p* values were  
635 obtained using Kruskal-Wallis, a non-parametric test for the comparison of multiple groups.  
636 \*\*\*, statistically significant with  $p < 0.0001$ . **b,** Bacterial growth curves of different subgroups  
637 of cpKP isolates. The dashed line indicated the timepoint at 1 h, when bacteria were at the  
638 logarithmic growth phases; corresponding *OD*<sub>600</sub> values (mean ± standard error) were shown in  
639 the embedded bar-plot. **c,** Bacterial *in vitro* competition experiments. Shown were the Ct value  
640 ratios (mean ± standard error) between each two cpKP isolates at 24h, 48h, and 72h, respectively.

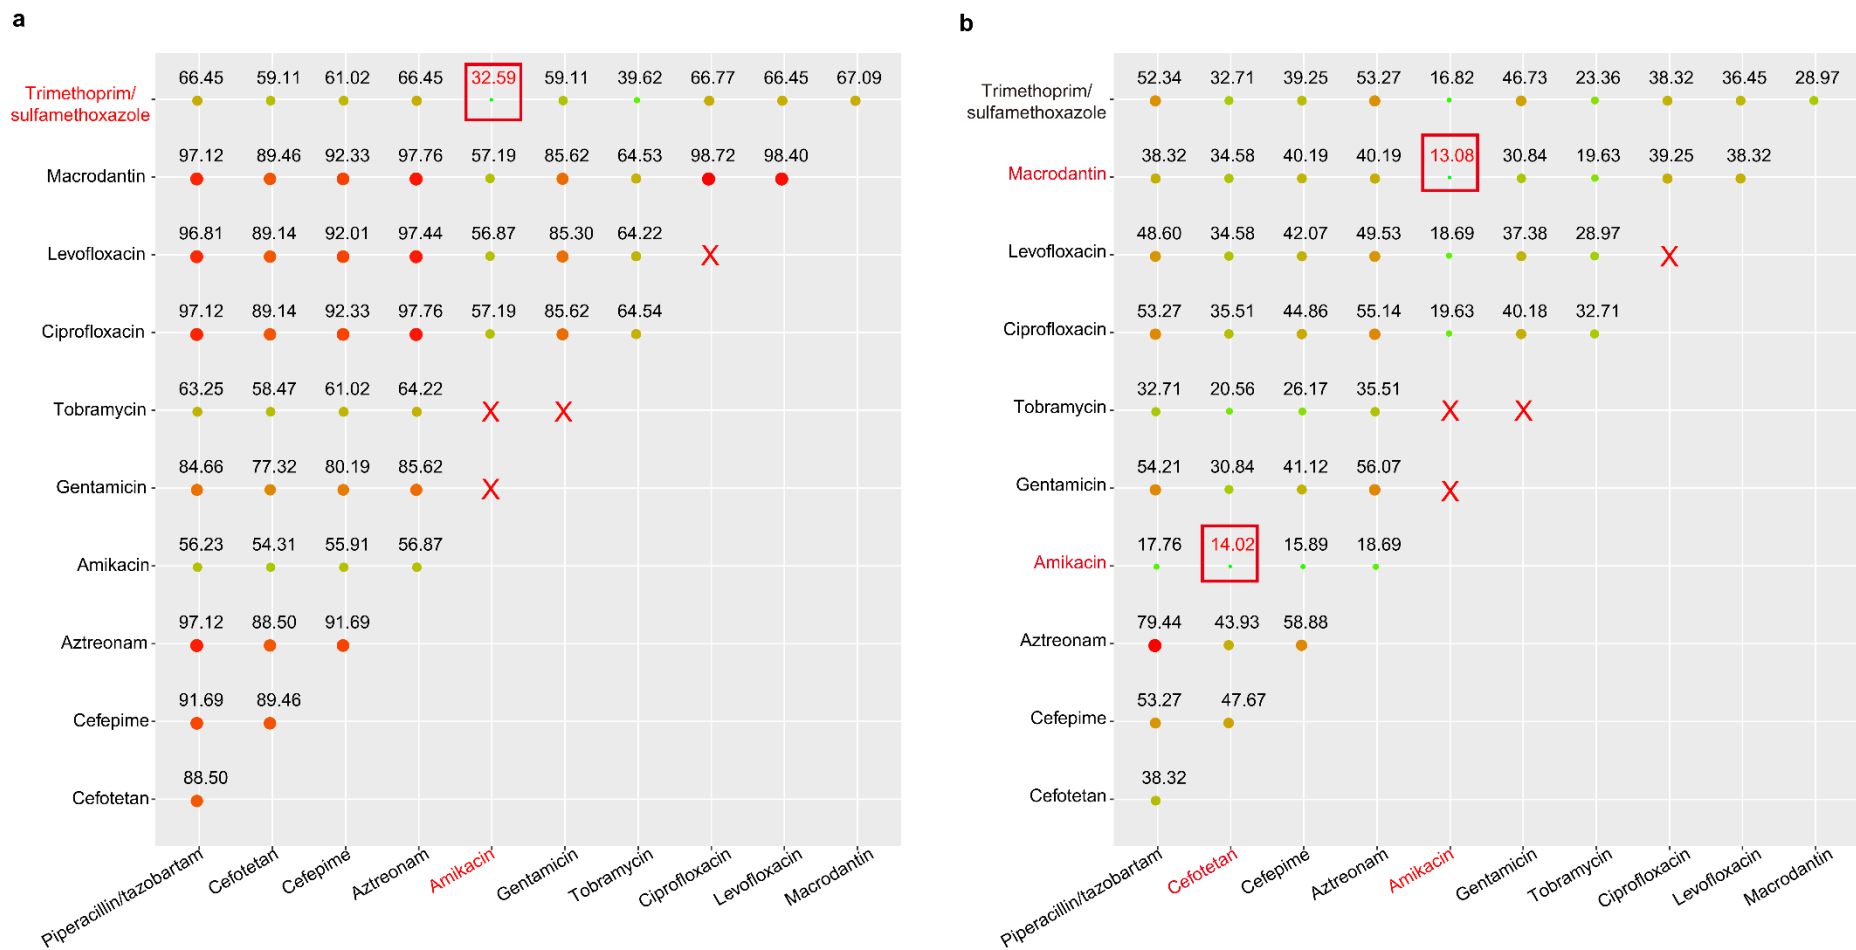

641

642 **Fig. 6| Optimized two-antibiotics combination regimens for treatment of CG258 and non-CG258.** Shown were the resistance ratios (the  
 643 numbers of isolates resistant to both antibiotics tested/the total numbers of isolates) when different two-antibiotics combination regimens were  
 644 used for the treatment of CG258 (a) and non-CG258 (b). The drug resistance ratio of each two different drug combinations of 11 antibiotics

645 (excluding 10 antibiotics with the resistance ratio of ~100% and some banned drug combinations) was calculated. The size of the solid circles  
646 increases with the increase in resistance ratio. The red rectangle indicates the optimized drug combinations of two drugs. The red cross indicates  
647 the prohibited drug combinations since they belong to the same type of antimicrobial drug.

648



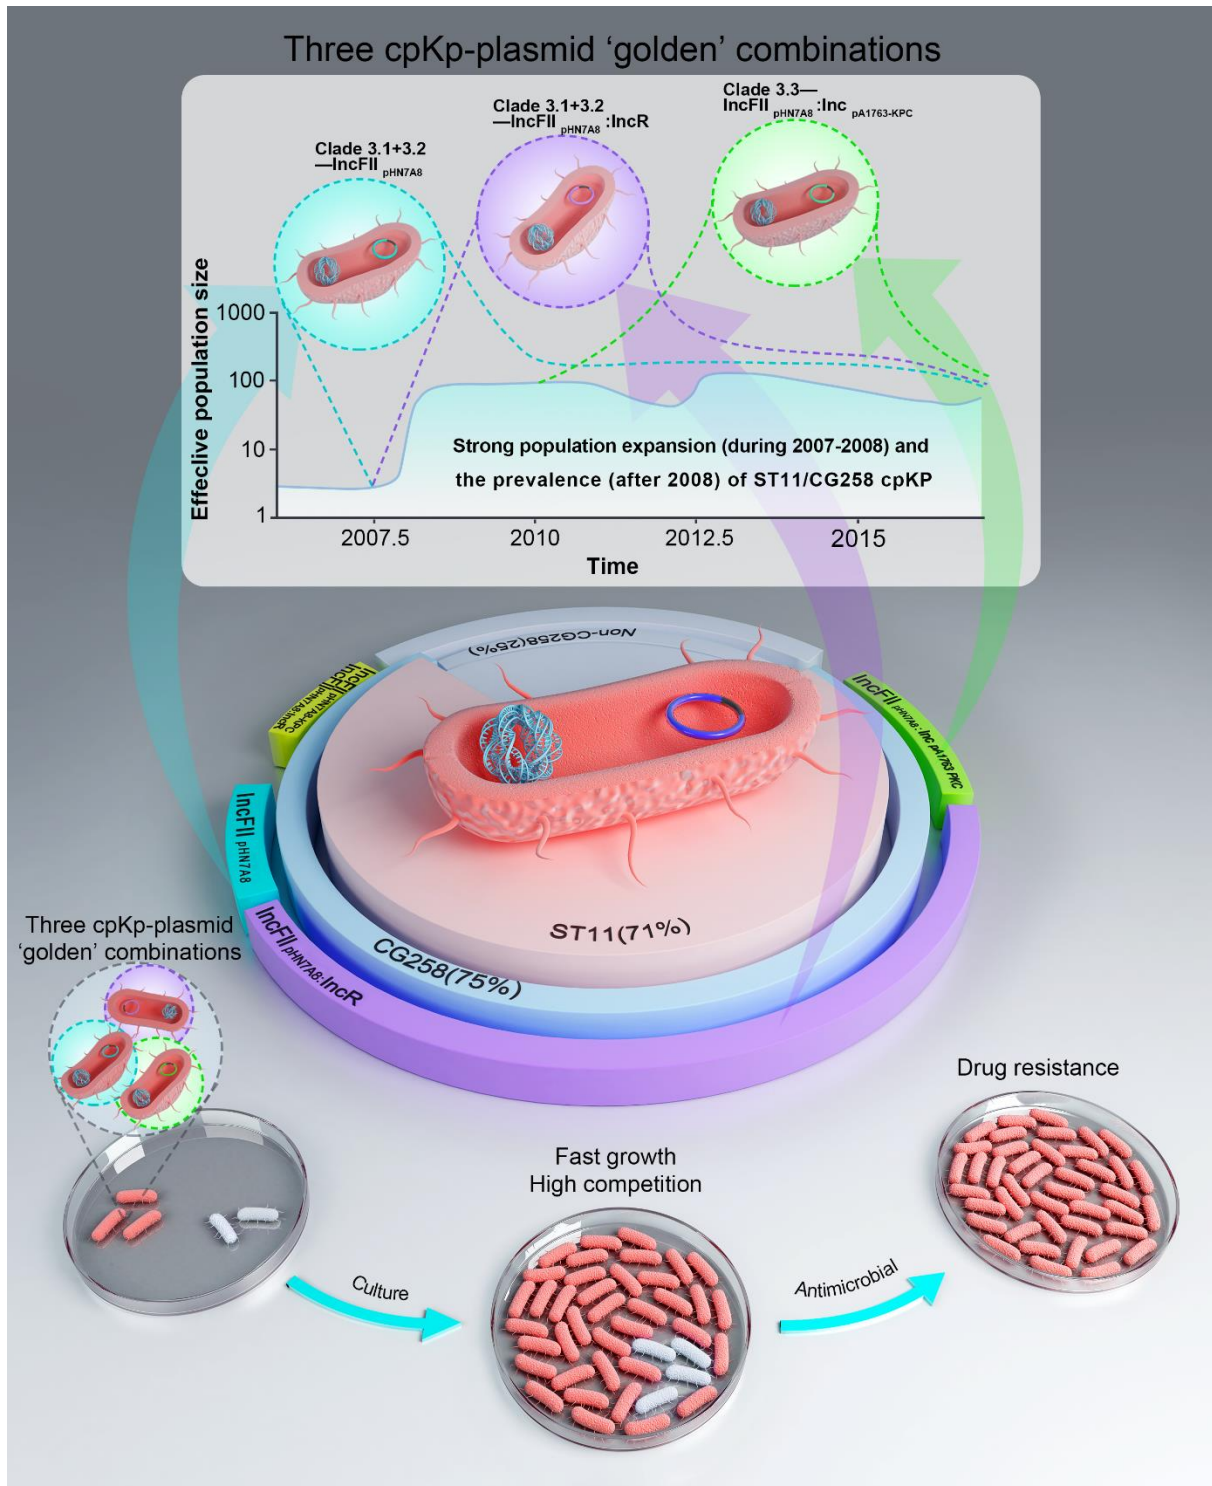

649

650 **Fig. 7| Three 'golden' host—plasmid combinations.** The three 'golden' host—plasmid  
651 combinations (Clade 3.1+3.2—IncFII<sub>pHN7A8</sub>, Clade 3.1+3.2—IncFII<sub>pHN7A8</sub>:IncR, Clade 3.3—  
652 IncFII<sub>pHN7A8</sub>:Inc<sub>pA1763-KPC</sub>) led to the strong population expansion during 2007-2008 and  
653 subsequent maintenance of the prevalence and clonal dissemination of ST11/CG258 cpKP after  
654 2008. They endowed cpKP with the phenotypes advantages in growth, competition and

655 resistance.

656

## Supplementary Information

### **Three bacterium-plasmid golden combinations facilitate the spread of ST11/CG258 carbapenemase-producing *Klebsiella pneumoniae* in China**

Cuidan Li<sup>1#</sup>, Xiaoyuan Jiang<sup>1,2#</sup>, Tingting Yang<sup>1#</sup>, Yingjiao Ju<sup>1,3#</sup>, Zhe Yin<sup>2</sup>, Liya Yue<sup>1</sup>,  
Guanan Ma<sup>1</sup>, Xuebing Wang<sup>1</sup>, Ying Jing<sup>2</sup>, Xinhua Luo<sup>2</sup>, Shuangshuang Li<sup>1,3</sup>, Xue  
Yang<sup>1,3</sup>, Fei Chen<sup>1,3,4,5\*</sup>, Dongsheng Zhou<sup>2\*</sup>

\*To whom correspondence should be addressed. Tel: +86 010 66948503; E-mail: dongshengzhou1977@gmail.com

\*Correspondence may also be addressed to Prof. Fei Chen. Tel: +86 010 84097460; Fax: +86 010 84097720; E-mail: chenfei@big.ac.cn

This PDF file includes:

Detailed methods

Table S2 to Table S7

Figure S1 to Figure S13

Table S1, presented as a separate document

[Table S2, included in this document](#)

[Table S3, included in this document](#)

[Table S4, included in this document](#)

[Table S5, included in this document](#)

[Table S6, included in this document](#)

[Table S7, included in this document](#)

[Figure S1, included in this document](#)

[Figure S2, included in this document](#)

[Figure S3, included in this document](#)

[Figure S4, included in this document](#)

[Figure S5, included in this document](#)

[Figure S6, included in this document](#)

[Figure S7, included in this document](#)

[Figure S8, included in this document](#)

[Figure S9, included in this document](#)

[Figure S10, included in this document](#)

[Figure S11, included in this document](#)

[Figure S12, included in this document](#)

[Figure S13, included in this document](#)

**Table S2|Carbapenemase genes from our 420 cpKP isolates**

| <b>Carbapenemase gene</b>                                 | <b>Number of isolates (%)</b> |
|-----------------------------------------------------------|-------------------------------|
| <i>bla</i> <sub>KPC</sub>                                 | 372 (88.57)                   |
| <i>bla</i> <sub>KPC-2</sub>                               | 369 (87.86)                   |
| <i>bla</i> <sub>KPC-3</sub>                               | 1 (0.24)                      |
| <i>bla</i> <sub>KPC-5</sub>                               | 2 (0.48)                      |
| <i>bla</i> <sub>NDM</sub>                                 | 26 (6.19)                     |
| <i>bla</i> <sub>NDM-1</sub>                               | 25 (5.95)                     |
| <i>bla</i> <sub>NDM-5</sub>                               | 1 (0.24)                      |
| <i>bla</i> <sub>IMP</sub>                                 | 19 (4.52)                     |
| <i>bla</i> <sub>IMP-4</sub>                               | 13 (3.10)                     |
| <i>bla</i> <sub>IMP-38</sub>                              | 6 (1.43)                      |
| <i>bla</i> <sub>KPC</sub> + <i>bla</i> <sub>NDM</sub>     | 3 (0.71)                      |
| <i>bla</i> <sub>KPC-2</sub> + <i>bla</i> <sub>NDM-1</sub> | 3 (0.71)                      |

**Table S3|Carbapenemase genes from different STs/CGs of our 420 cpKp isolates**

| CG    | ST     | Number of isolates (%) |                                      |                                      |                                                                      |                                      |
|-------|--------|------------------------|--------------------------------------|--------------------------------------|----------------------------------------------------------------------|--------------------------------------|
|       |        | Total                  | <i>bla</i> <sub>KPC</sub> - carrying | <i>bla</i> <sub>NDM</sub> - carrying | <i>bla</i> <sub>KPC</sub> - and <i>bla</i> <sub>NDM</sub> - carrying | <i>bla</i> <sub>IMP</sub> - carrying |
| CG258 | ST11   | 298                    | 295 (99)                             |                                      | 1 (0.3)                                                              | 2 (0.7)                              |
|       | ST2667 | 7                      | 7 (100)                              |                                      |                                                                      |                                      |
|       | ST3348 | 6                      | 6 (100)                              |                                      |                                                                      |                                      |
|       | ST258  | 2                      | 1 (50.0)                             | 1 (50.0)                             |                                                                      |                                      |
| CG1   | ST1    | 6                      | 2 (33.3)                             | 4 (66.7)                             |                                                                      |                                      |
| CG12  | ST12   | 1                      | 1 (100)                              |                                      |                                                                      |                                      |
| CG13  | ST13   | 1                      | 1 (100)                              |                                      |                                                                      |                                      |
| CG15  | ST15   | 17                     | 16 (94.1)                            |                                      |                                                                      | 1 (5.9)                              |
|       | ST2237 | 6                      | 6 (100)                              |                                      |                                                                      |                                      |
|       | ST3349 | 1                      |                                      | 1 (100)                              |                                                                      |                                      |
|       | ST14   | 1                      |                                      |                                      |                                                                      | 1 (100)                              |
| CG17  | ST17   | 3                      |                                      | 1 (33.3)                             |                                                                      | 2 (66.7)                             |
|       | ST16   | 1                      | 1 (100)                              |                                      |                                                                      |                                      |
| CG22  | ST1010 | 1                      | 1 (100)                              |                                      |                                                                      |                                      |
| CG23  | ST23   | 2                      | 2 (100)                              |                                      |                                                                      |                                      |
|       | ST846  | 1                      |                                      |                                      |                                                                      | 1 (100)                              |
|       | ST218  | 1                      | 1 (100)                              |                                      |                                                                      |                                      |
| CG35  | ST449  | 2                      |                                      |                                      | 2 (100)                                                              |                                      |
| CG37  | ST37   | 4                      | 2 (50.0)                             | 1 (25.0)                             |                                                                      | 1 (25.0)                             |
|       | ST896  | 1                      | 1 (100)                              |                                      |                                                                      |                                      |
| CG40  | ST40   | 1                      |                                      | 1 (100)                              |                                                                      |                                      |
| CG43  | ST43   | 1                      |                                      |                                      |                                                                      | 1 (100)                              |
| CG45  | ST1493 | 1                      |                                      | 1 (100)                              |                                                                      |                                      |
|       | ST1106 | 1                      | 1 (100)                              |                                      |                                                                      |                                      |
| CG65  | ST65   | 2                      | 2 (100)                              |                                      |                                                                      |                                      |
|       | ST685  | 1                      | 1 (100)                              |                                      |                                                                      |                                      |
| CG86  | ST86   | 1                      | 1 (100)                              |                                      |                                                                      |                                      |
| CG147 | ST147  | 7                      | 2 (28.6)                             | 5 (71.4)                             |                                                                      |                                      |
|       | ST273  | 4                      |                                      | 4 (100)                              |                                                                      |                                      |
| CG231 | ST231  | 1                      | 1 (100)                              |                                      |                                                                      |                                      |
| CG292 | ST3345 | 2                      |                                      |                                      |                                                                      | 2 (100)                              |
| CG307 | ST307  | 7                      | 1 (14.3)                             |                                      |                                                                      | 6 (85.7)                             |
| CG313 | ST313  | 1                      |                                      | 1 (100)                              |                                                                      |                                      |
| CG395 | ST395  | 1                      | 1 (100)                              |                                      |                                                                      |                                      |
| CG515 | ST2176 | 1                      |                                      |                                      |                                                                      | 1 (100)                              |
| CG661 | ST661  | 1                      | 1 (100)                              |                                      |                                                                      |                                      |

|        |        |   |          |          |  |         |
|--------|--------|---|----------|----------|--|---------|
| CG716  | ST1958 | 5 | 5 (100)  |          |  |         |
|        | ST3334 | 1 | 1 (100)  |          |  |         |
| CG815  | ST268  | 5 | 5 (100)  |          |  |         |
| CG1306 | ST1306 | 1 |          | 1 (100)  |  |         |
| CG2390 | ST3350 | 1 |          | 1 (100)  |  |         |
| CG2670 | ST2670 | 1 |          | 1 (100)  |  |         |
| CG3132 | ST290  | 6 | 5 (83.3) | 1 (16.7) |  |         |
| CG1801 | ST1333 | 1 | 1 (100)  |          |  |         |
| NA     | ST2480 | 1 |          | 1 (100)  |  |         |
| NA     | ST3333 | 1 |          | 1 (100)  |  |         |
| NA     | ST1114 | 1 |          |          |  | 1 (100) |
| NA     | ST2153 | 1 | 1 (100)  |          |  |         |

**Table S4|Inc groups of the 377 *bla*<sub>KPC</sub>-carrying plasmids\***

| <b>Inc group<br/>(n=32)</b>                                | <b>Number of plasmids<br/>(n=377)</b> | <b>%Percent</b> |
|------------------------------------------------------------|---------------------------------------|-----------------|
| IncFII <sub>pHN7A8</sub>                                   | 28                                    | 7.43            |
| IncFII <sub>pHN7A8</sub> :IncR                             | 163                                   | 43.24           |
| IncFII <sub>pHN7A8</sub> :Inc <sub>pA1763</sub> -KPC       | 59                                    | 15.65           |
| IncFII <sub>pHN7A8</sub> :IncN1                            | 1                                     | 0.27            |
| IncFII <sub>pHN7A8</sub> :IncN1:IncR                       | 2                                     | 0.53            |
| IncFII <sub>pHN7A8</sub> :Inc <sub>pA1763</sub> -KPC:IncN1 | 2                                     | 0.53            |
| IncFII <sub>pHN7A8</sub> :IncFIB <sub>pFB2.3</sub>         | 1                                     | 0.27            |
| IncFII <sub>pKPHS2</sub> :Inc <sub>pA1763</sub> -KPC       | 36                                    | 9.55            |
| IncFII <sub>pKPHS2</sub> :IncR                             | 5                                     | 1.33            |
| IncFII <sub>pKPHS2</sub> :IncFIB <sub>pSC138</sub>         | 1                                     | 0.27            |
| IncFII <sub>pKPHS2</sub> :Inc <sub>pLT968725</sub>         | 1                                     | 0.27            |
| IncFII <sub>pKPHS2</sub> :Inc <sub>pA1763</sub> -KPC:IncR  | 2                                     | 0.53            |
| IncFII <sub>p0716</sub> -KPC:Inc <sub>pA1763</sub> -KPC    | 30                                    | 7.96            |
| IncFII <sub>p0716</sub> -KPC:IncR                          | 1                                     | 0.27            |
| IncFII <sub>p0716</sub> -KPC:IncFIB <sub>pSC138</sub>      | 1                                     | 0.27            |
| IncFII <sub>pCP020359</sub> :Inc <sub>pA1763</sub> -KPC    | 7                                     | 1.86            |
| IncFII <sub>R100</sub>                                     | 4                                     | 1.06            |
| IncFII <sub>R100</sub> :IncFIB <sub>plasmid F</sub>        | 1                                     | 0.27            |
| IncFII <sub>R100</sub> :IncFIA <sub>pBK30661</sub>         | 1                                     | 0.27            |
| IncFII <sub>pBK30683</sub>                                 | 1                                     | 0.27            |
| IncX6                                                      | 10                                    | 2.65            |
| IncR                                                       | 3                                     | 0.80            |
| IncR:IncFIB <sub>plasmid F</sub>                           | 1                                     | 0.27            |
| IncR:Inc <sub>pA1763</sub> -KPC:IncN1                      | 2                                     | 0.53            |
| IncP-6                                                     | 3                                     | 0.80            |
| IncC                                                       | 2                                     | 0.53            |
| IncC:IncR                                                  | 1                                     | 0.27            |
| IncN1                                                      | 1                                     | 0.27            |
| IncFIA <sub>pBK30661</sub>                                 | 2                                     | 0.53            |
| Inc <sub>pA1763</sub> -KPC                                 | 2                                     | 0.53            |
| Inc <sub>pHS062105-3</sub>                                 | 2                                     | 0.53            |
| IncFIB <sub>pSC138</sub>                                   | 1                                     | 0.27            |

\* These 377 plasmids came from a total of 375 cpKP isolates. There were two different *bla*<sub>KPC</sub>-carrying plasmids in each of the two following isolates: an IncFII<sub>pHN7A8</sub>:IncR plasmid plus an IncX6 one in the G030 isolate, and an IncFII<sub>R100</sub>:IncFIA<sub>pBK30661</sub> plasmid plus an IncR:IncFIB<sub>plasmid F</sub> one in the G300 isolate.



**Table S5|The Inc group of blaKPC-carrying plasmids of the 38 complete ST11 KP genome downloaded from NCBI.**

| <b>Inc group</b>                                     | <b>Number</b> | <b>Percent (%)</b> |
|------------------------------------------------------|---------------|--------------------|
| IncFII <sub>pHN7A8</sub>                             | 3             | 7.5                |
| IncFII <sub>pHN7A8</sub> :IncN1                      | 1             | 2.5                |
| IncFII <sub>pHN7A8</sub> :IncR                       | 27            | 67.5               |
| IncFII <sub>pHN7A8</sub> :IncR:IncN1                 | 1             | 2.5                |
| IncFII <sub>pHN7A8</sub> :Inc <sub>pA1763</sub> -KPC | 1             | 2.5                |
| IncFII <sub>pHN7A8</sub> :IncΔR                      | 1             | 2.5                |
| IncFII <sub>K</sub> :IncR                            | 2             | 5                  |
| IncFII <sub>K</sub> :IncR:Inc <sub>pA1763</sub> -KPC | 1             | 2.5                |
| IncR                                                 | 3             | 7.5                |

**Table S6| Percentage of cpKP isolates resistant to the 21 antibiotics in China\***

| <b>Class</b>                      | <b>Antibiotics</b>            | <b>Percentage (%)</b> |
|-----------------------------------|-------------------------------|-----------------------|
| Penicillins                       | Ampicillin                    | 99.8538               |
|                                   | Ampicillin/sulbactam          | 0.956098              |
|                                   | Piperacillin                  | 0.990834              |
|                                   | Piperacillin/tazobactam       | 0.925744              |
| Cephalosporins, first generation  | Cefazolin                     | 0.991408              |
| Cephalosporins, second generation | Cefuroxime                    | 0.982398              |
|                                   | Cefotetan                     | 0.93741               |
| Cephalosporins, third generation  | Ceftazidime                   | 0.962959              |
|                                   | Ceftriaxone                   | 0.945567              |
| Cephalosporins, fourth generation | Cefepime                      | 0.891937              |
| Monobactams                       | Aztreonam                     | 0.919133              |
| Carbapenems                       | Impenem                       | 0.914203              |
|                                   | Meropenem                     | 0.86514               |
| Aminoglycosides                   | Amikacin                      | 0.494484              |
|                                   | Gentamicin                    | 0.647221              |
|                                   | Tobramycin                    | 0.715353              |
| Fluoroquinolones                  | Ciprofloxacin                 | 0.782454              |
|                                   | Levofloxacin                  | 0.681667              |
| Furans                            | Macrodantin                   | 0.957                 |
| Sulfanilamides                    | Sulfamethoxazole/trimethoprim | 0.702209              |

\*Data are derived from all the 31 literatures published since 2017(1-31).

**Table S7|PCR primers used in the competition experiment.**

| <b>cpKP isolate*</b> | <b>ST/CG</b> | <b><i>bla</i><sub>KPC</sub>-carrying plasmid</b>        | <b>Target gene</b> | <b>Primer sequences</b>                                        |
|----------------------|--------------|---------------------------------------------------------|--------------------|----------------------------------------------------------------|
| G134                 | ST11/CG258   | IncFII <sub>pHN7A8</sub>                                | G134_05212         | F: 5'-ACCGAAACATTCTCCGCACT-3'<br>R: 5'-CCTGCGGAAACAACCTGGTA-3' |
| G285                 | ST11/CG258   | IncFII <sub>pHN7A8</sub> :IncR                          | G285_01367         | F: 5'-CGCTCTGAGAACGTCGTCAT-3'<br>R: 5'-ACCTGGAAATGCGGGTCTTT-3' |
| G318                 | ST11/CG258   | IncFII <sub>pHN7A8</sub> :Inc <sub>pA1763</sub> -KPC    | G318_02254         | F: 5'-CTCATCCATCGCACTACCCG-3'<br>R: 5'-AGGGTAGGTGAAAAGCTCGC-3' |
| G165                 | ST11/CG258   | IncFII <sub>p0716</sub> -KPC:Inc <sub>pA1763</sub> -KPC | G165_02217         | F: 5'-TTACAAGGGCCGCTGACATT-3'<br>R: 5'-CGGGTAGTGCGATGGATGAG-3' |
| G344 (control)       | Non-CG258    | IncFII <sub>pKPHS2</sub> :Inc <sub>pA1763</sub> -KPC    | G344_00764         | F: 5'-TTGCCTTTCAGATCGCGACT-3'<br>R: 5'-GTCTCAGGGCCATCAGTAGC-3' |

\*Each isolate contained a single plasmid.

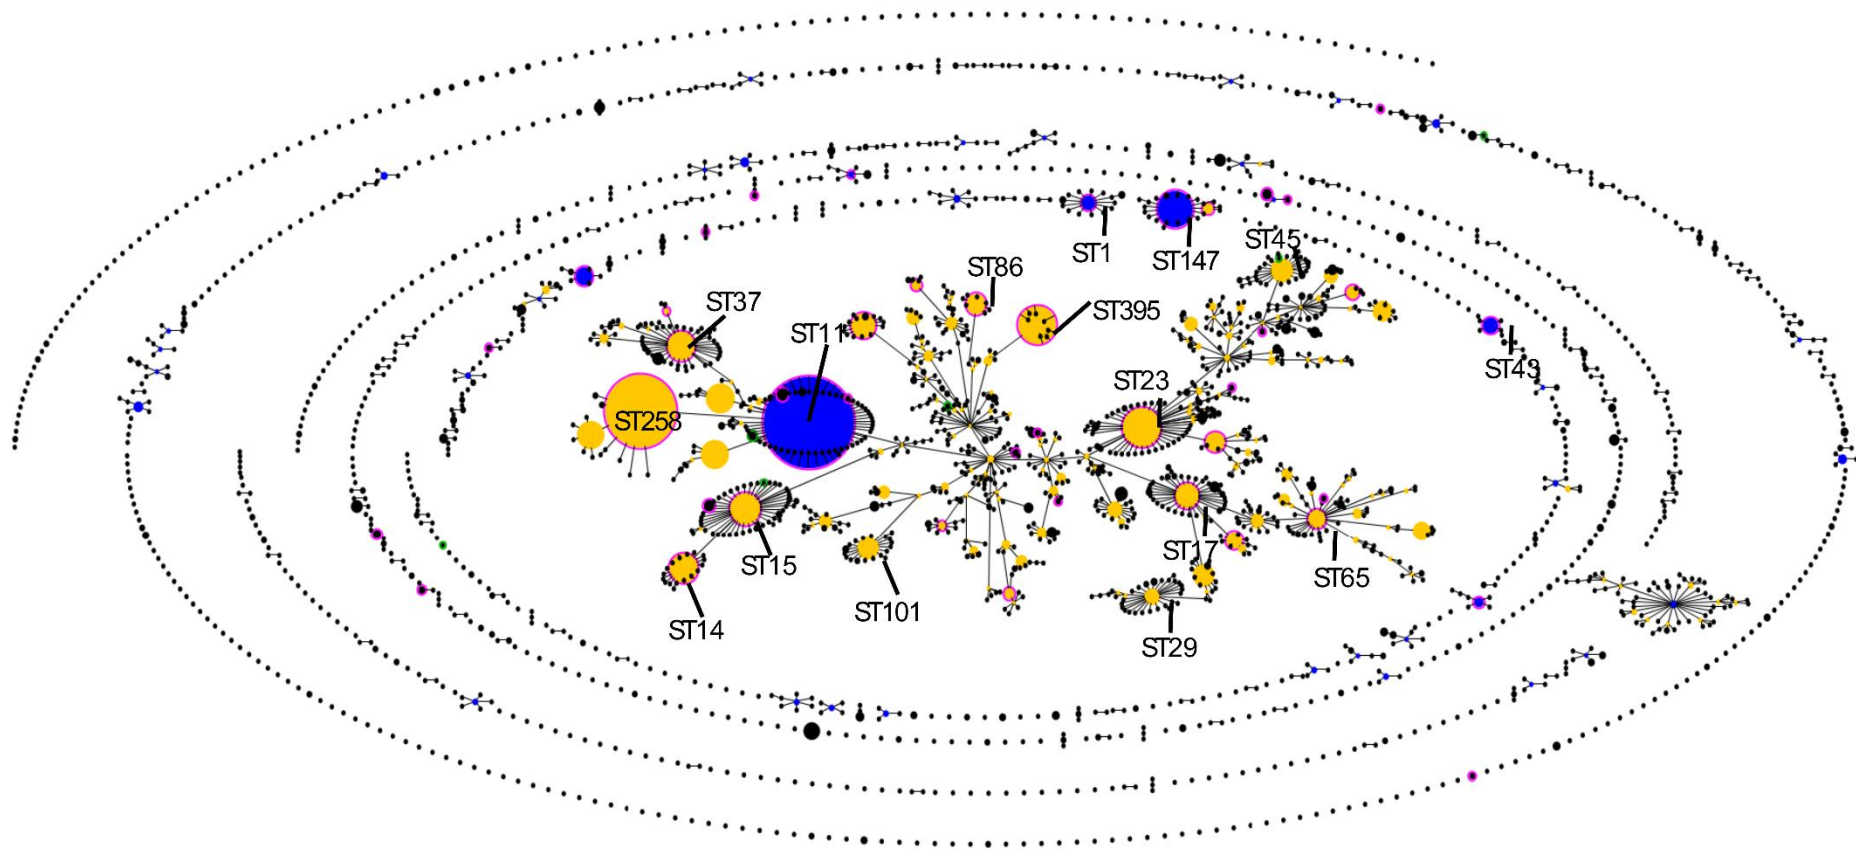

**Figure S1. An population snapshot of the 5,099 global KP isolates.** These isolates included our 420 cpKp isolates and the 4,679 isolates from the *Klebsiella* MLST database. The lines between STs indicated single-locus variants. The size of circle represented number of isolates. The circles with green rings represented the eight novel STs found in our 420 cpKp isolates, while those with cyan rings stood for the STs found in both our 420 cpKp isolates and the MLST database.

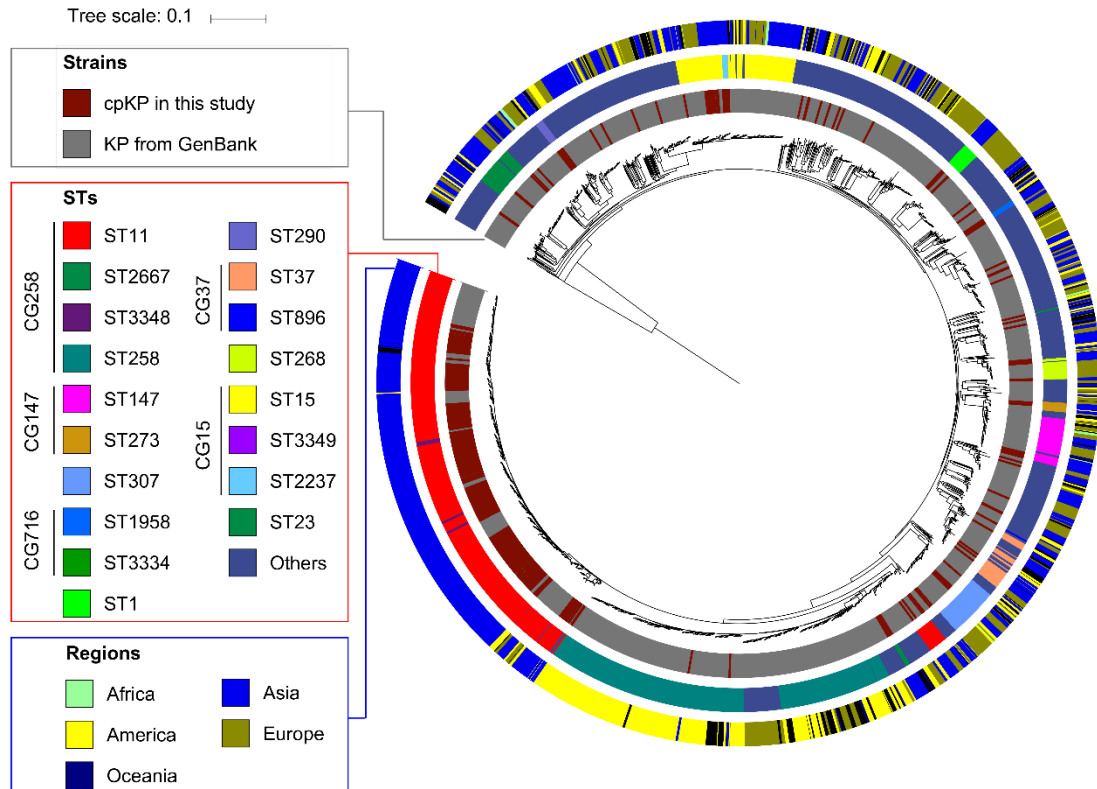

**Figure S2. A maximum-likelihood clustering tree of the 2,300 global KP isolates.** These isolates included our 420 cpKp isolates and the 1,880 isolates with determined genome sequences from GenBank (last accessed April 10, 2018). The tree was constructed from the 610,814 core SNPs of these 2,300 genome sequences. *K. variicola* DSM 15968 was used as the outgroup but not shown in the tree.

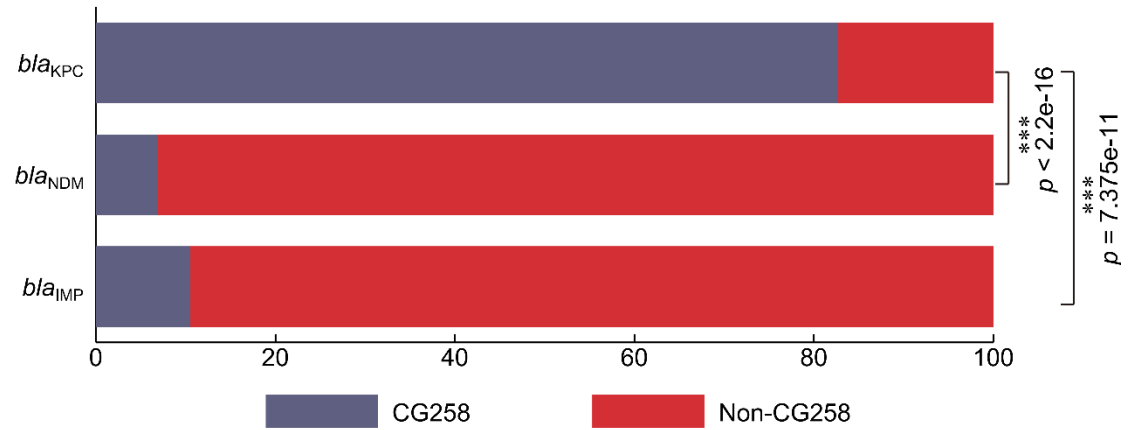

**Figure S3. Prevalence of carbapenemase genes in CG258 and non-CG258 cpKP isolates.** The numbers on the y-axis represented the percentage values. The  $p$  values were obtained using Fisher exact test. \*\*\*, statistically significant with  $p < 0.0001$ .

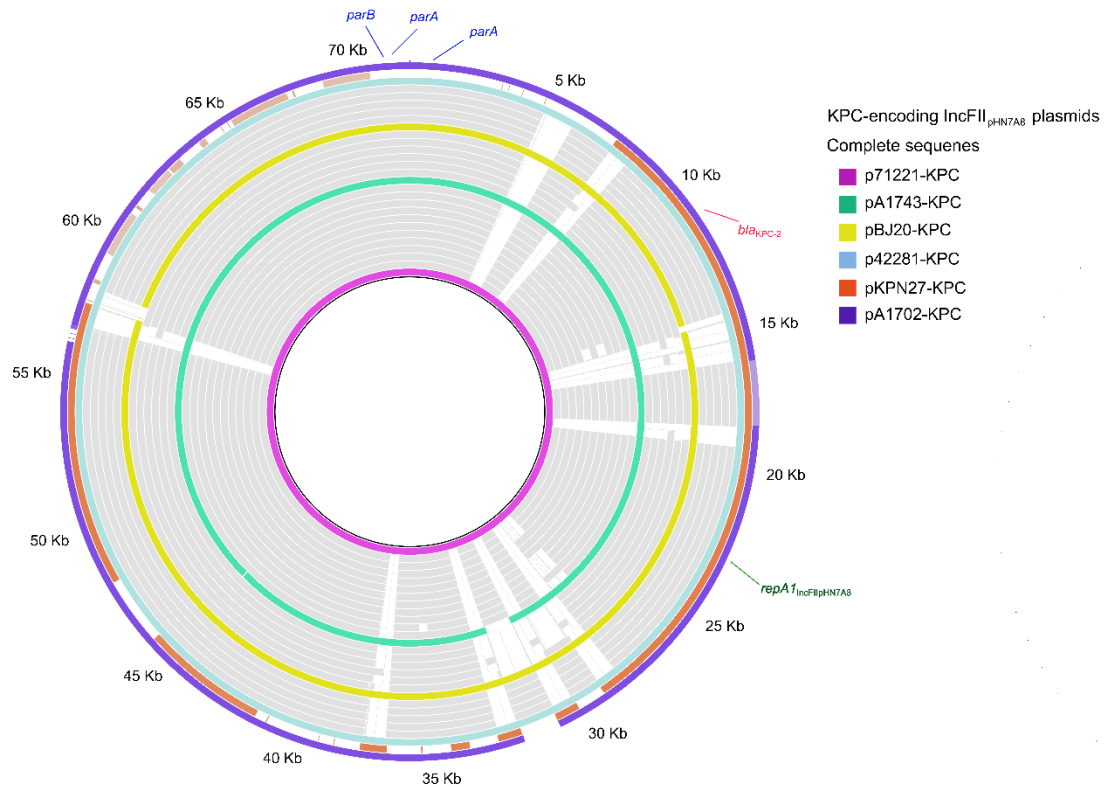

**Figure S4. Alignment of the 28 *bla*<sub>KPC</sub>-carrying *IncFII*<sub>pHN7A8</sub> plasmids from our 420 cpKp isolates.** The color rings represented the fully sequenced plasmids, while the grey rings stood for those with draft sequences.

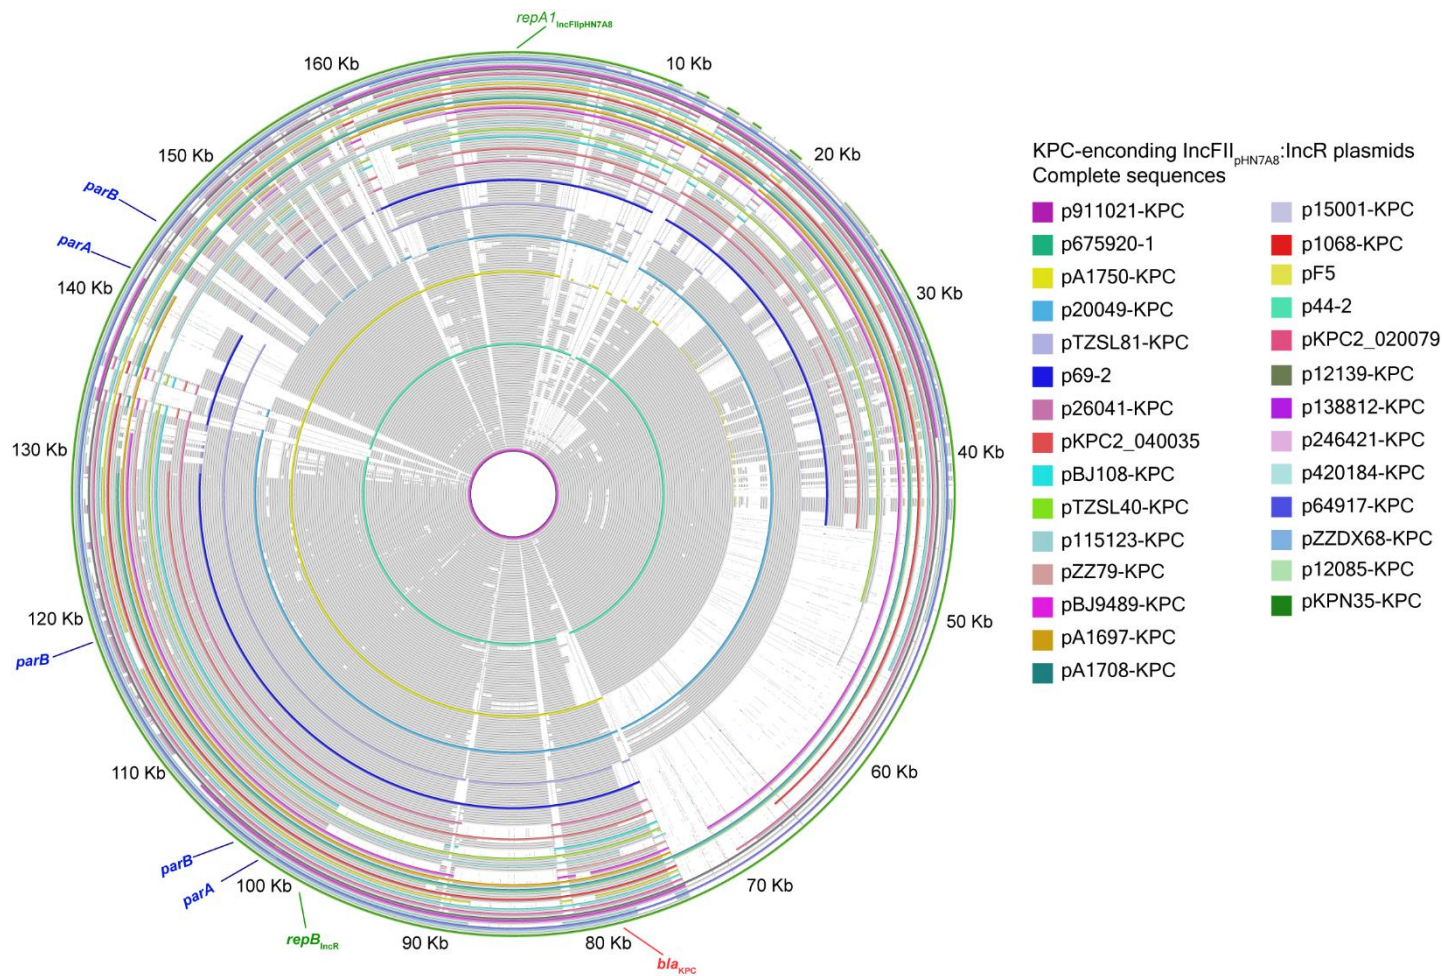

**Figure S5 Alignment of the 163 bla<sub>KPC</sub>-carrying IncFIIpHN7A8:IncR plasmids from our 420 cpKp isolates. The color rings represented the fully sequenced plasmids, while the grey rings stood for those with draft sequences.**



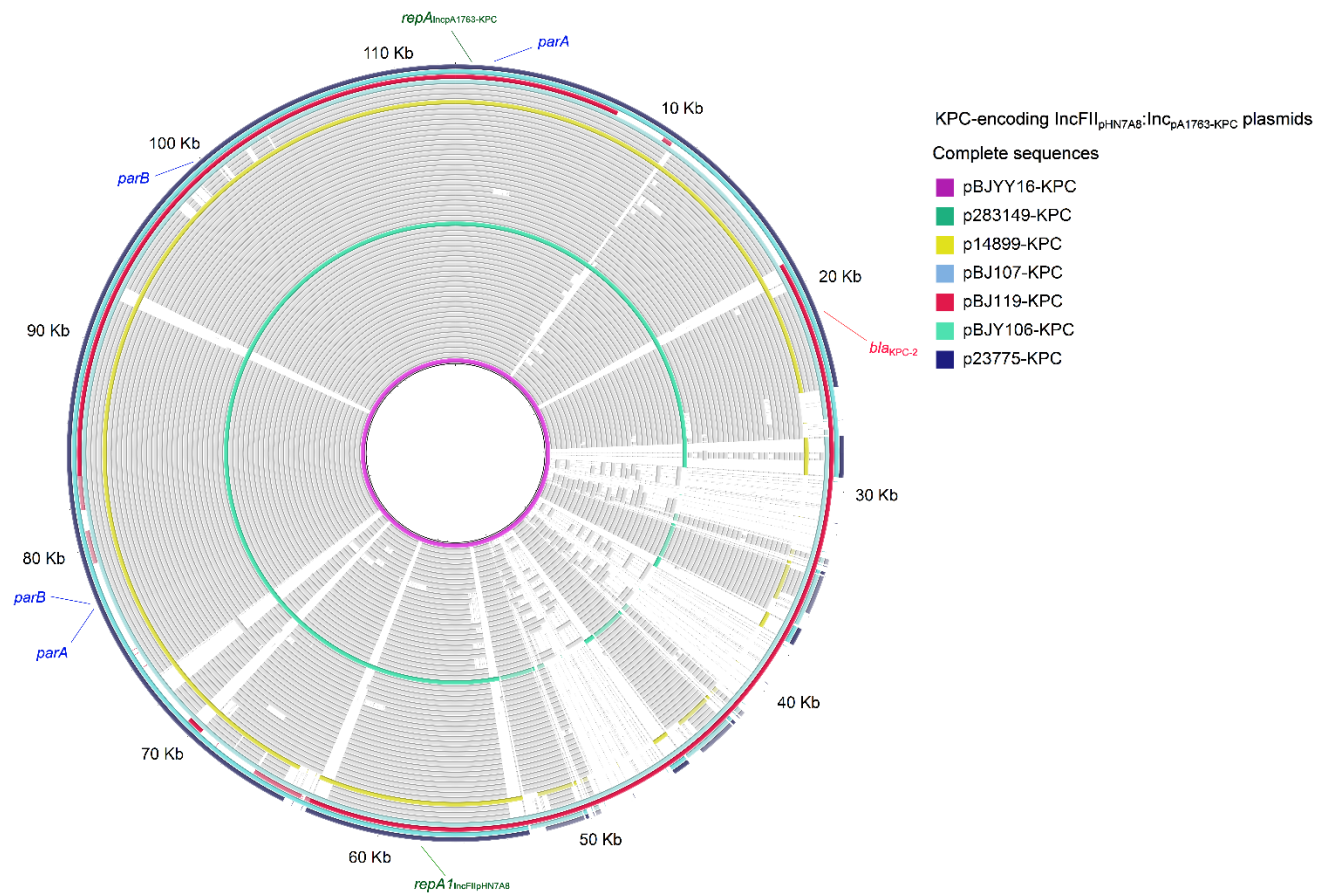

**Figure S6. Alignment of the 59 *bla*<sub>KPC</sub>-carrying IncFII<sub>pHN7A8</sub>:Inc<sub>PA1763</sub>-KPC plasmids from our 420 cpKp isolates.** The color rings represented the fully sequenced plasmids, while the grey rings stood for those with draft sequences.

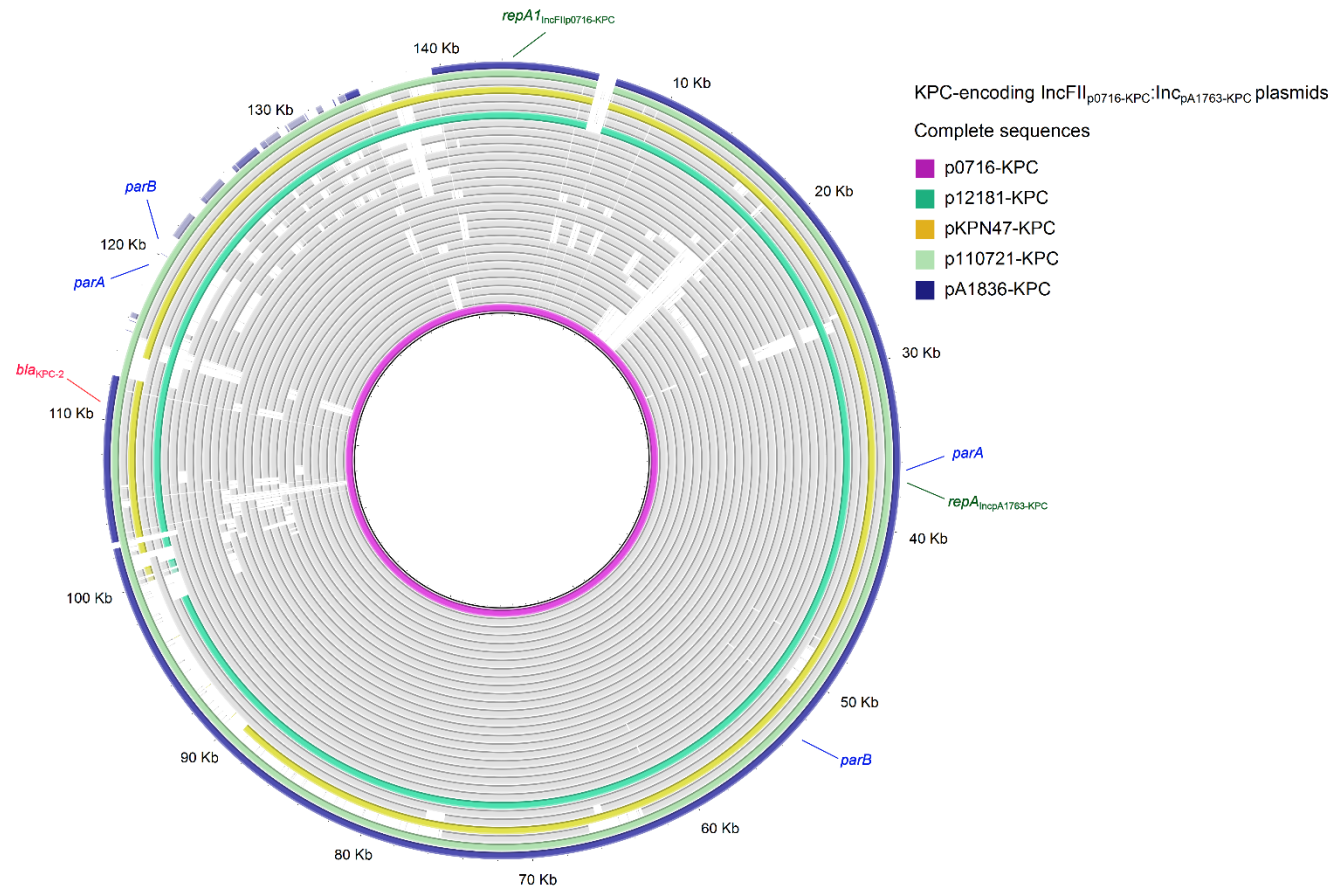

**Figure S7.** Alignment of the 30 *blaKPC*-carrying IncFII0716-KPC:IncA1763-KPC plasmids from our 420 cpKp isolates. The color rings represented the fully sequenced plasmids, while the grey rings stood for those with draft sequences.

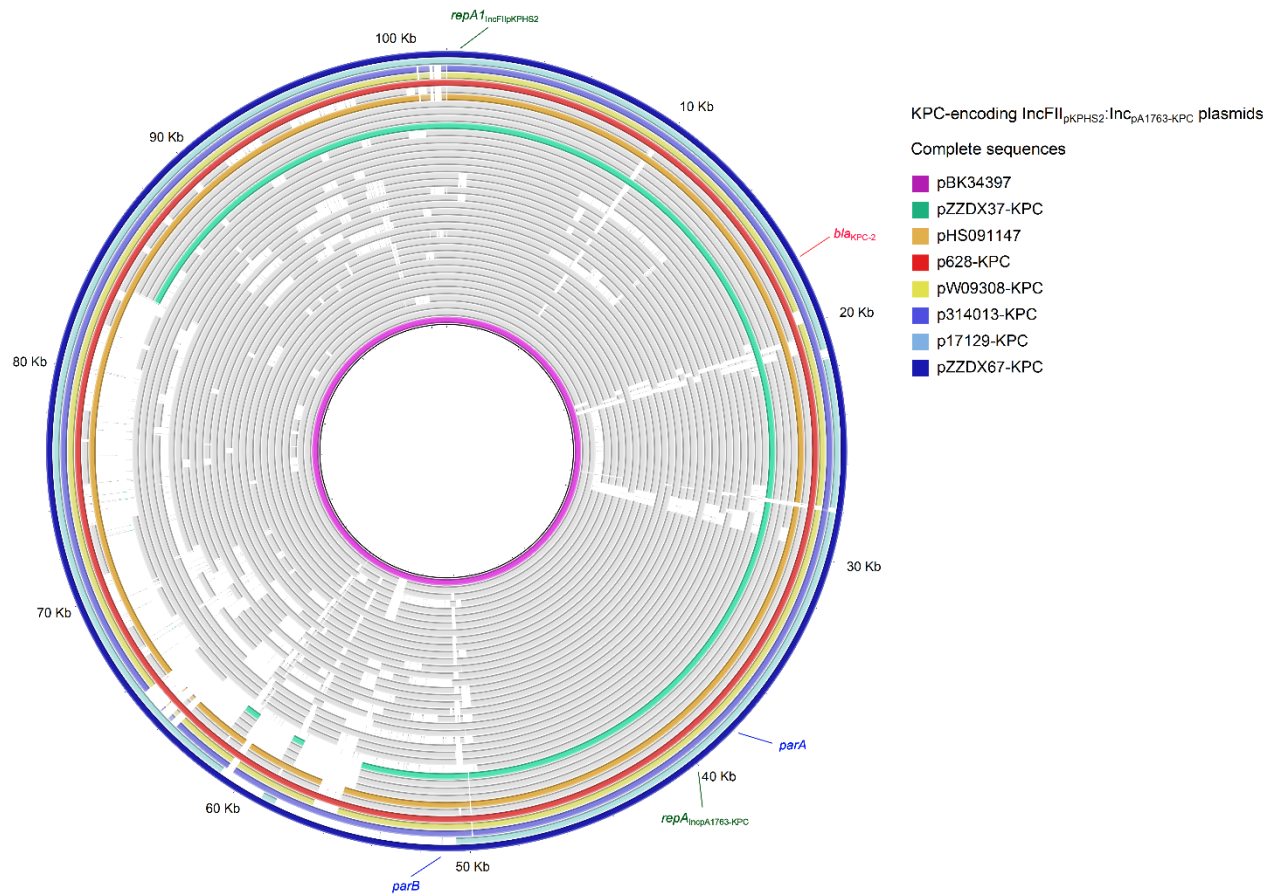

**Figure S8. Alignment of the 36 *bla*<sub>KPC</sub>-carrying IncFII<sub>pKPHS2</sub>:Inc<sub>PA1763</sub>-KPC plasmids from our 420 cpKp isolates. The color rings represented the fully sequenced plasmids, while the grey rings stood for those with draft sequences.**

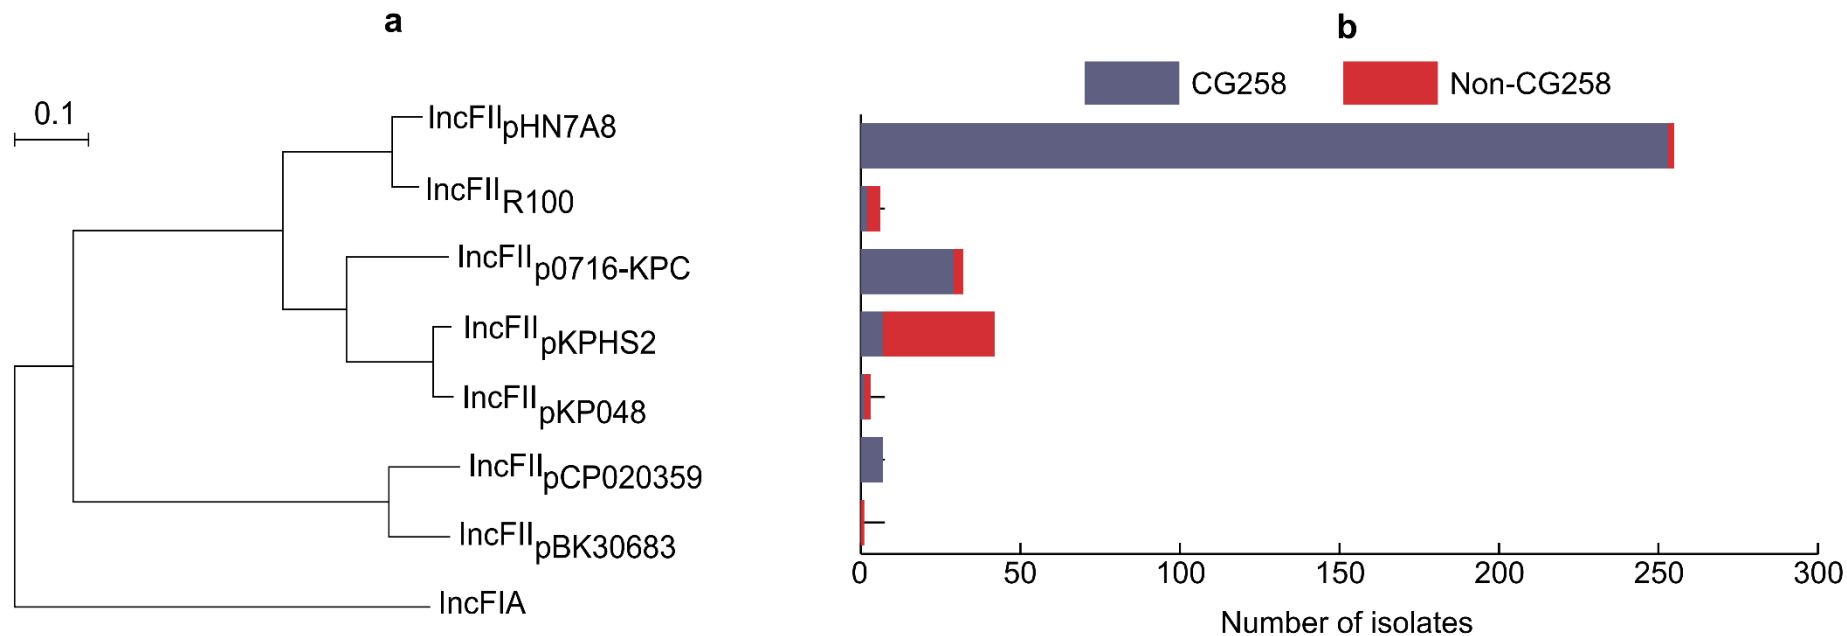

**Figure S9. Divergence of IncFII replicons and their prevalence in CG258 and non-CG258.** **a**, A maximum likelihood tree of seven subsets of IncFII replicons. The IncFIA replicon of plasmid F (accession number AP001918) was used the outgroup. **b**, The prevalence of *bla*<sub>KPC</sub>-carrying plasmids with IncFII replicons in CG258 and non-CG258 cpKP isolates.

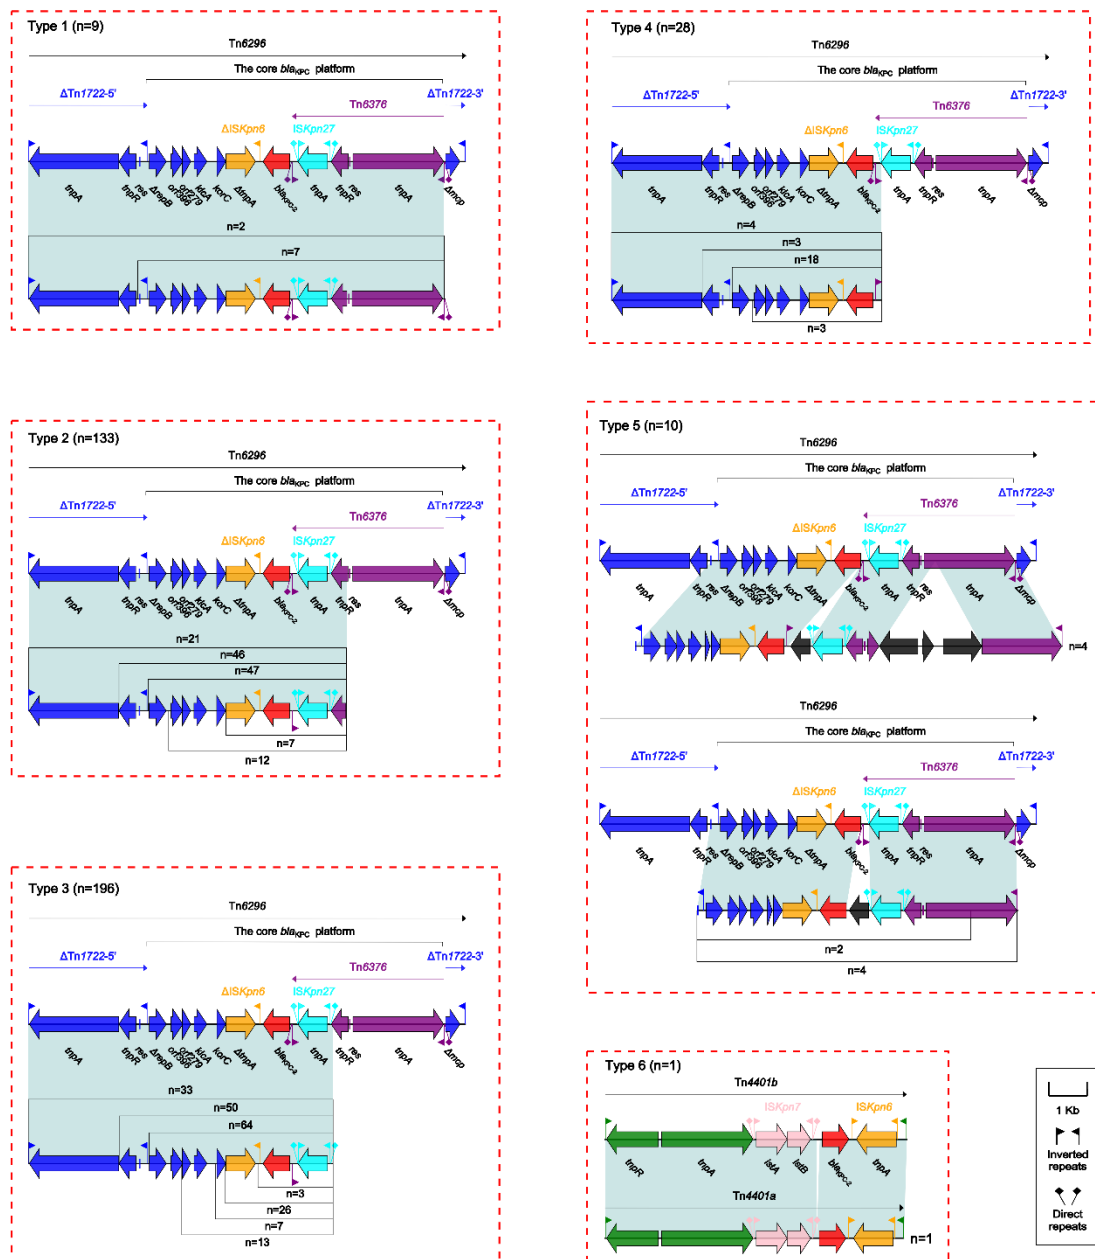

**Figure S10. Local *bla*<sub>KPC</sub> genetic environments.** Genes were denoted by arrows. Genes, mobile genetic elements and other features were colored based on the functional classification. Shadow denoted homology regions ( $\geq 95\%$  identity).

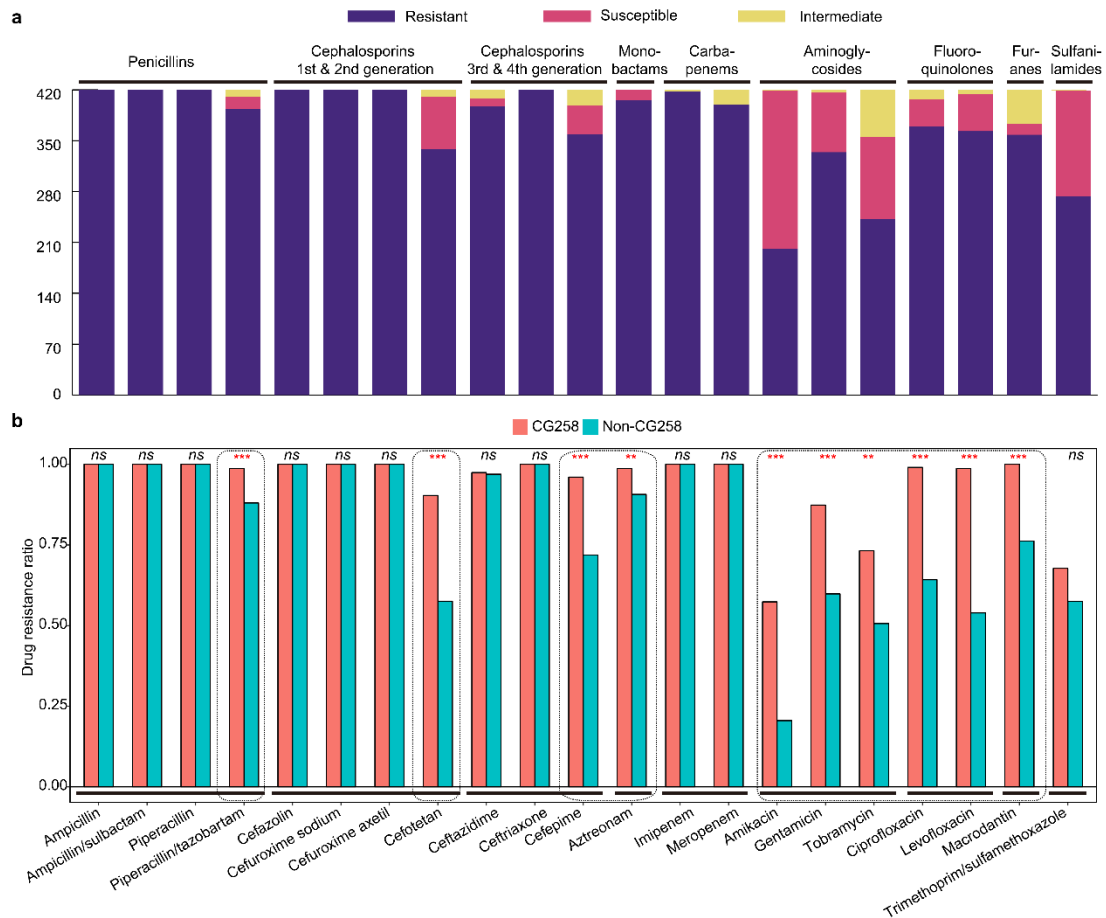

**Figure S11. Antimicrobial susceptibility data of cpKP isolates.** Shown were the drug resistance profile of our 420 cpKP isolates (a), and the resistance rates [resistant/(sensitivity + resistant)] of CG258 and non-CG258 isolates for each indicated antibiotics. A total of 21 antibiotics in nine classes were tested. The *p* values were obtained using Fisher's exact test. NS, no significant difference. \*\* and \*\*\*, statistically significant with *p* < 0.001 and *p* < 0.0001, respectively.

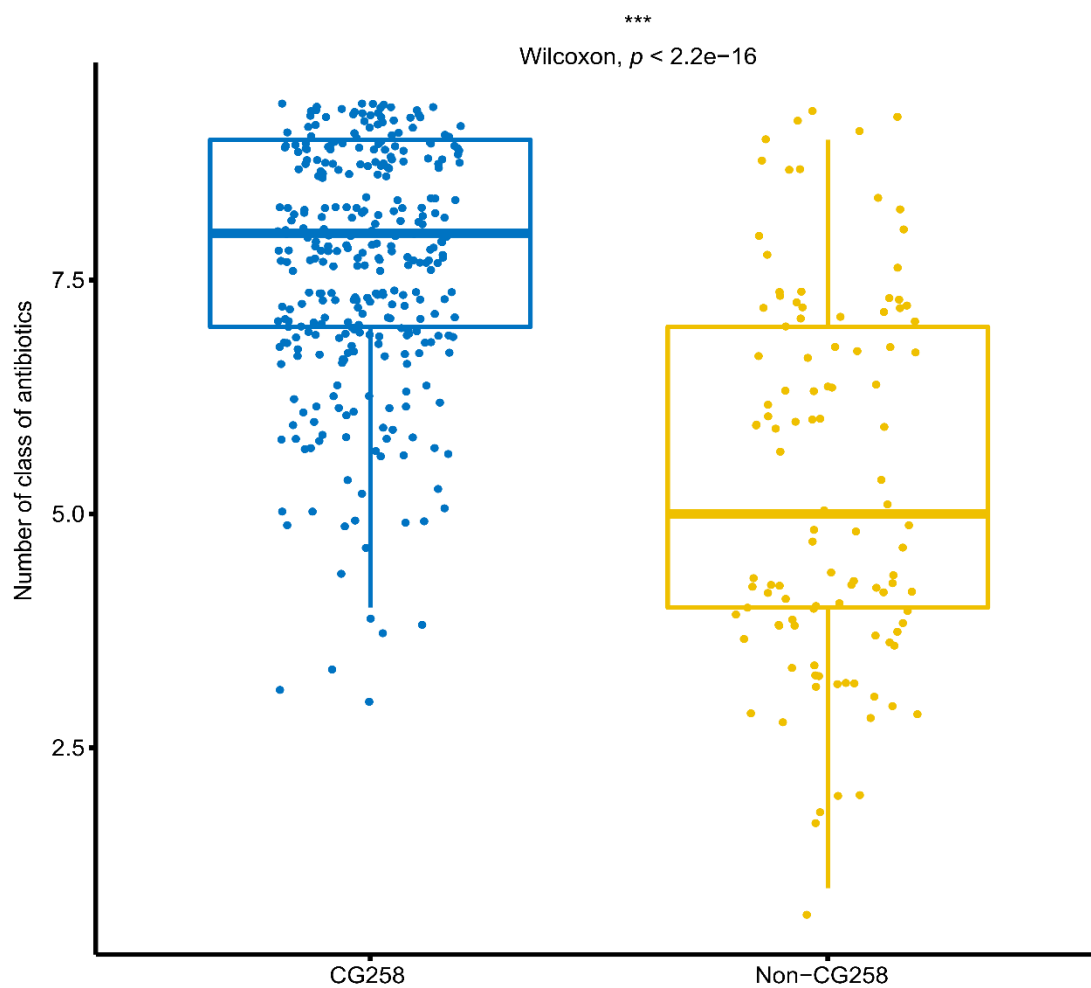

**Figure S12. Boxplots showing the numbers of classes of antibiotics that CG258 and non-CG258 isolates were resistant to. The  $p$  value was tested using Wilcoxon test. \*\*\*, statistically significant with  $p < 0.0001$ .**

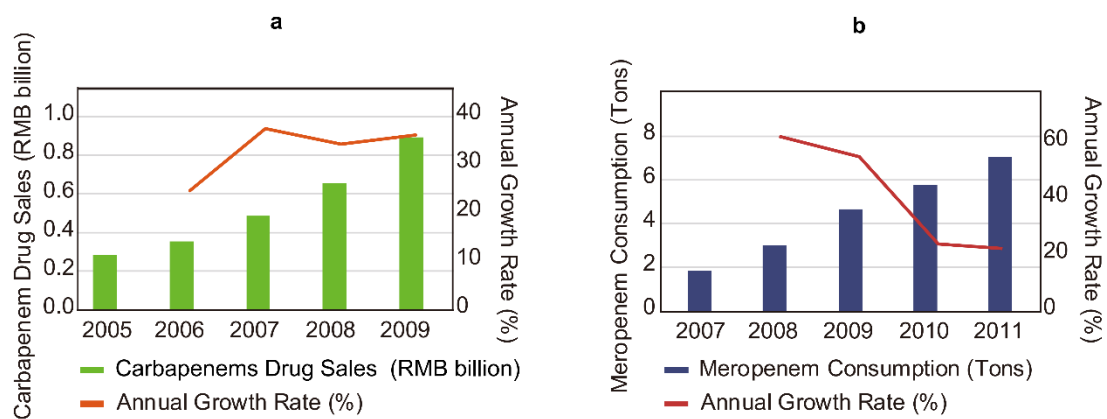

**Figure S13. Carbapenem sales/consumption in China. a,** Carbapenem sales in China from 2005 to 2009. **b,** Meropenem consumption in China from 2007 to 2011.



## References

1. Lin D, Chen J, Yang Y, Cheng J, & Sun C (2018) Epidemiological Study of Carbapenem-resistant Klebsiella Pneumoniae. *Open Med (Wars)* 13:460-466.
2. Lin L, Xiao X, Wang X, Xia M, & Liu S (2020) In Vitro Antimicrobial Susceptibility Differences Between Carbapenem-Resistant KPC-2-Producing and NDM-1-Producing Klebsiella pneumoniae in a Teaching Hospital in Northeast China. *Microb Drug Resist* 26(2):94-99.
3. Liu L, *et al.* (2018) Carbapenem-resistant Isolates of the Klebsiella pneumoniae Complex in Western China: The Common ST11 and the Surprising Hospital-specific Types. *Clin Infect Dis* 67(suppl\_2):S263-S265.
4. Meng X, *et al.* (2019) Assessing Molecular Epidemiology of Carbapenem-resistant Klebsiella pneumoniae (CR-KP) with MLST and MALDI-TOF in Central China. *Sci Rep* 9(1):2271.
5. Ou Q, Li W, Li B, & Yu C (2017) Prevalence of Carbapenem-Resistant Klebsiella Pneumoniae (CRKP) and the Distribution of Class 1 Integron in Their Strains Isolated from a Hospital in Central China. *Chin Med Sci J* 32(2):107-102.
6. Shi Y, *et al.* (2020) Characterization and genome sequencing of a novel T7-like lytic phage, kpsk3, infecting carbapenem-resistant Klebsiella pneumoniae. *Arch Virol* 165(1):97-104.
7. Shu LB, *et al.* (2019) Prevalence and phenotypic characterization of carbapenem-resistant Klebsiella pneumoniae strains recovered from sputum and fecal samples of ICU patients in Zhejiang Province, China. *Infect Drug Resist* 12:11-18.
8. Wang Q, *et al.* (2018) Phenotypic and Genotypic Characterization of Carbapenem-resistant Enterobacteriaceae: Data From a Longitudinal Large-scale CRE Study in China (2012-2016). *Clin Infect Dis* 67(suppl\_2):S196-S205.
9. Chen Z & Xiang J (2018) [Preliminary study on resistance mechanism and virulence features in carbapenems-resistant Klebsiella pneumoniae from burn patients]. *Zhonghua Shao Shang Za Zhi* 34(11):796-801.
10. Chiu SK, *et al.* (2017) Tigecycline resistance among carbapenem-resistant Klebsiella Pneumoniae: Clinical characteristics and expression levels of efflux pump genes. *PLoS One* 12(4):e0175140.
11. Dong F, *et al.* (2018) Epidemiology of Carbapenem-Resistant Klebsiella pneumoniae Bloodstream Infections in a Chinese Children's Hospital: Predominance of New Delhi Metallo-beta-Lactamase-1. *Microb Drug Resist* 24(2):154-160.
12. Li J, *et al.* (2019) Isolation and characterization of a sequence type 25 carbapenem-resistant hypervirulent Klebsiella pneumoniae from the mid-south region of China. *BMC Microbiol* 19(1):219.
13. Liao Y, *et al.* (2017) Retrospective analysis of fosfomycin combinational therapy for sepsis caused by carbapenem-resistant Klebsiella pneumoniae. *Exp Ther Med* 13(3):1003-1010.
14. Sun WM, *et al.* (2019) [The efficacy and safety of different antimicrobial regimens in carbapenem-resistant Klebsiella pneumoniae bloodstream infections]. *Zhonghua Nei Ke Za Zhi* 58(8):566-571.
15. Tang X, Xiao M, Zhuo C, Xu Y, & Zhong N (2018) Multi-level analysis of bacteria isolated from inpatients in respiratory departments in China. *J Thorac Dis* 10(5):2666-2675.
16. Tian D, Pan F, Wang C, Sun Y, & Zhang H (2018) Resistance phenotype and clinical molecular epidemiology of carbapenem-resistant Klebsiella pneumoniae among pediatric patients in

- Shanghai. *Infect Drug Resist* 11:1935-1943.
17. Tseng SP, *et al.* (2017) The plasmid-mediated fosfomycin resistance determinants and synergy of fosfomycin and meropenem in carbapenem-resistant *Klebsiella pneumoniae* isolates in Taiwan. *J Microbiol Immunol Infect* 50(5):653-661.
  18. Wang Z, *et al.* (2019) Outbreak of blaNDM-5-Harboring *Klebsiella pneumoniae* ST290 in a Tertiary Hospital in China. *Microb Drug Resist* 25(10):1443-1448.
  19. Yan J, *et al.* (2017) Multidrug Resistance Mechanisms of Carbapenem Resistant *Klebsiella pneumoniae* Strains Isolated in Chongqing, China. *Ann Lab Med* 37(5):398-407.
  20. Yan Z, *et al.* (2019) Prospective investigation of carbapenem-resistant *Klebsiella pneumoniae* transmission among the staff, environment and patients in five major intensive care units, Beijing. *J Hosp Infect* 101(2):150-157.
  21. Yu F, *et al.* (2019) Dissemination of *Klebsiella pneumoniae* ST11 isolates with carbapenem resistance in integrated and emergency intensive care units in a Chinese tertiary hospital. *J Med Microbiol* 68(6):882-889.
  22. Yu L, *et al.* (2019) Synergetic Effects of Combined Treatment of Colistin With Meropenem or Amikacin on Carbapenem-Resistant *Klebsiella pneumoniae* in vitro. *Front Cell Infect Microbiol* 9:422.
  23. Zeng L, *et al.* (2019) Prevalence of Carbapenem-Resistant *Klebsiella pneumoniae* Infection in Southern China: Clinical Characteristics, Antimicrobial Resistance, Virulence, and Geographic Distribution. *Microb Drug Resist*.
  24. Zhan L, *et al.* (2017) Outbreak by Hypermucoviscous *Klebsiella pneumoniae* ST11 Isolates with Carbapenem Resistance in a Tertiary Hospital in China. *Front Cell Infect Microbiol* 7:182.
  25. Zhang J, *et al.* (2019) Tigecycline in combination with other antibiotics against clinical isolates of carbapenem-resistant *Klebsiella pneumoniae* in vitro. *Ann Palliat Med* 8(5):622-631.
  26. Zhang P, *et al.* (2020) Emergence of ceftazidime/avibactam resistance in carbapenem-resistant *Klebsiella pneumoniae* in China. *Clin Microbiol Infect* 26(1):124 e121-124 e124.
  27. Zhang X, Chen D, Xu G, Huang W, & Wang X (2018) Molecular epidemiology and drug resistant mechanism in carbapenem-resistant *Klebsiella pneumoniae* isolated from pediatric patients in Shanghai, China. *PLoS One* 13(3):e0194000.
  28. Zhang Y, *et al.* (2018) Risk factors for carbapenem-resistant *K. pneumoniae* bloodstream infection and predictors of mortality in Chinese paediatric patients. *BMC Infect Dis* 18(1):248.
  29. Zhao D, Zuo Y, Wang Z, & Li J (2019) Characterize carbapenem-resistant *Klebsiella pneumoniae* isolates for nosocomial pneumonia and their Gram-negative bacteria neighbors in the respiratory tract. *Mol Biol Rep* 46(1):609-616.
  30. Zheng B, *et al.* (2017) Molecular Epidemiology and Risk Factors of Carbapenem-Resistant *Klebsiella pneumoniae* Infections in Eastern China. *Front Microbiol* 8:1061.
  31. Gu B, *et al.* (2019) Clonal dissemination of KPC-2-producing *Klebsiella pneumoniae* ST11 and ST48 clone among multiple departments in a tertiary teaching hospital in Jiangsu Province, China. *Ann Transl Med* 7(23):716.
